# Pitfalls and Remedies for Cross Validation with Multi-trait Genomic Prediction Methods

Daniel Runcie<sup>\*,1</sup> and Hao Cheng<sup>†</sup>

<sup>\*</sup>Department of Plant Sciences, University of California Davis, Davis, CA, USA, <sup>†</sup>Department of Animal Science, University of California Davis, Davis, CA, USA

**ABSTRACT** Incorporating measurements on correlated traits into genomic prediction models can increase prediction accuracy and selection gain. However, multi-trait genomic prediction models are complex and prone to overfitting which may result in a loss of prediction accuracy relative to single-trait genomic prediction. Cross-validation is considered the gold standard method for selecting and tuning models for genomic prediction in both plant and animal breeding. When used appropriately, cross-validation gives an accurate estimate of the prediction accuracy of a genomic prediction model, and can effectively choose among disparate models based on their expected performance in real data. However, we show that a naive cross-validation strategy applied to the multi-trait prediction problem can be severely biased and lead to sub-optimal choices between single and multi-trait models when secondary traits are used to aid in the prediction of focal traits and these secondary traits are measured on the individuals to be tested. We use simulations to demonstrate the extent of the problem and propose three partial solutions: 1) a parametric solution from selection index theory, 2) a semi-parametric method for correcting the cross-validation estimates of prediction accuracy, and 3) a fully non-parametric method which we call CV2\*: validating model predictions against focal trait measurements from genetically related individuals. The current excitement over high-throughput phenotyping suggests that more comprehensive phenotype measurements will be useful for accelerating breeding programs. Using an appropriate cross-validation strategy should more reliably determine if and when combining information across multiple traits is useful.

## KEYWORDS

Cross Validation  
Genomic Prediction  
Linear Model  
Mixed Model  
multi-trait

1  
2  
3 **INTRODUCTION**  
4 Genomic Selection (GS) aims to increase the speed and accuracy of  
5 selection in breeding programs by predicting the genetic worth of  
6 candidate individuals or lines earlier in the selection process, or  
7 for individuals that cannot be directly phenotyped (Meuwissen

8 *et al.* 2001; Hayes *et al.* 2009; Crossa *et al.* 2017). Genomic selec-  
9 tion works by training statistical or Machine Learning models on  
10 a set of completely phenotyped and genotyped individuals, and  
11 then using the trained model to predict the genetic worth of un-  
12 measured individuals. If the predictions are reasonably accurate,  
13 selection intensity can be increased either because the population  
14 size of candidate individuals is larger or their true genetic worth is  
15 estimated more accurately.

16 Predictions of genetic values are usually based only on the geno-

17 types or pedigrees of the new individuals. However predictions  
18 can in some cases be improved by including measurements of  
19 “secondary” traits that may not be of direct interest but are easier or  
20 faster to measure (Thompson and Meyer 1986; Pszczola *et al.* 2013;  
21 Lado *et al.* 2018). This is one goal of multi-trait genomic prediction.  
22 Multi-trait prediction is most useful for increasing the accuracy of  
23 selection on a single focal trait when that trait has low heritability,  
24 the “secondary” traits have high heritability, and the genetic and  
25 non-genetic correlations between the traits are large and opposing  
26 (Thompson and Meyer 1986; Jia and Jannink 2012; Cheng *et al.*  
27 2018). With the advent of cheap high-throughput phenotyping,  
28 there is great interest in using measurements of early-life or easily  
29 accessible traits to improve prediction of later-life or more expen-  
30 sive traits, and multi-trait prediction models are attractive methods  
31 for leveraging this information (Pszczola *et al.* 2013; Rutkoski *et al.*  
32 2016; Fernandes *et al.* 2017; Lado *et al.* 2018).

33 A large number of genomic prediction methods are available,  
34 and the best model varies across systems and traits (Heslot *et al.*  
35 2012; de Los Campos *et al.* 2013). Due to their complexity and often  
36 high-dimensional nature, genomic prediction methods are prone  
37 to overfitting and require regularization to perform well on new  
38 data. Therefore, comparing models based on their ability to fit  
39 existing data (ex. with  $R^2$ ) is unreliable; every candidate model  
40 could explain 100% of the variation in a typical-size dataset.

41 Instead, prediction models are generally compared by cross-  
42 validation (Meuwissen *et al.* 2001; Utz *et al.* 2000; Gianola and  
43 Schon 2016). The basic idea of cross-validation is to separate the  
44 model fitting and tuning process from the model evaluation pro-  
45 cess by using separate datasets for each (Hastie *et al.* 2009). This  
46 penalizes models that fit too closely to one data set at the expense  
47 of generalization. In this way, cross-validation is meant to accu-  
48 rately simulate the real-world usage of the model: predicting the  
49 genetic values of un-phenotyped individuals; i.e. those not avail-  
50 able during the model fitting process itself. Rather than requiring  
51 new data *per se*, cross-validation works by splitting an existing  
52 dataset into non-overlapping “training” and “testing” partitions,  
53 fitting the candidate model to the former, and then evaluating it on  
54 its accuracy at predicting the latter. Common measures of accuracy  
55 include Pearson’s  $\rho$  or the square root of the average squared error  
56 (RMSE) (Daetwyler *et al.* 2013). This process of splitting, training,  
57 and predicting is typically repeated several times on the same  
58 dataset to get a combined or averaged measure of accuracy across

59 different random partitions of the data.

Estimates of model accuracy by cross-validation are not perfect  
(Hastie *et al.* 2009). They are subject to sampling error as are any  
other statistic. They are also typically downwardly biased because  
smaller training datasets are used for the cross-validation than in  
the actually application of a model. However in typical cases, this  
downward bias is the same for competing models and thus does  
not impact model choice (Hothorn *et al.* 2005).

However, cross-validation can give upwardly biased estimates  
of model accuracy when misused due to various forms of “data-  
leakage” between the training and testing datasets, leading to  
overly optimistic estimates of model performance (Kaufman *et al.*  
2012). Several potential mistakes in cross-validation experiments  
are well known:

- **Biased testing data selection.** The individuals in the model testing partitions should have the same distribution of genetic (and environmental) relatedness to the training population as individuals in the remaining target population (Amer and Banos 2010; Daetwyler *et al.* 2013). For example, if siblings or clones are present in the data, they should not be split between testing and training partitions unless siblings or clones of individuals in the training partition are also at the same frequency in the target population. Similarly, if the goal is to predict into a diverse breeding population, the cross-validation should not be performed only within one F2 mapping population.
- **Overlap between the testing and training datasets.** The observations used as testing data should be kept separate from the training data at all stages of the cross-validation procedure. For example, if data from individuals in the testing dataset are used to calculate estimated genetic values (EBVs) for model training, then the testing and training datasets are overlapping, even if the testing individuals themselves are excluded from model training (Amer and Banos 2010).
- **Pre-selection of features (e.g. markers) based on the full dataset before cross-validation.** All aspects of model specification and training that rely on the observed phenotypes should be performed only on the training partitions, without respect to the testing partition. For example, if a large number of candidate markers are available but only a portion will be included in the final model, the selection of markers (i.e. features) should be done using only the training partition of phenotypes and the selection itself should be repeated

each replicate of the cross-validation on each new training dataset. If the feature selection is only done once on the whole dataset before cross-validation begins, this can lead to biased estimates of model accuracy (Hastie *et al.* 2009).

If these mistakes are avoided, cross-validation generally works well for comparing among single-trait methods, and in some cases for multi-trait methods. However, our goal in this paper is to highlight a challenge with using cross-validation to choose between single-trait methods and multi-trait methods; specifically multi-trait methods that use information from “secondary” traits measured on the target individuals to inform the prediction of their focal trait(s). In this case, standard cross-validation approaches lead to biased results. As we discuss below, the source of bias is not data leakage between the training and testing data *per se*, but correlated errors with respect to the true genetic merit between the secondary traits in the training data and the focal trait in the testing data. Note that this issue only occurs when the multiple traits are measured on the same individuals, and the traits share non-genetic covariance. When traits are measured on different individuals, the standard cross-validation approach is appropriate.

In the following sections, we first describe the opportunity offered by multi-trait genomic prediction models in this setting, and the challenge in evaluating them. We then develop a simulation study that highlights the extent of the problem. Next, we propose three partial solutions that lead to fairly consistent model selections between single and multi-trait models under certain situations. Finally, we draw conclusions on when this issue is likely to arise and when it can be safely ignored.

## GENERAL SETTING

Multi-trait genomic prediction is useful in two general settings: 1) When the overall value of an individual depends on each trait simultaneously (ex. fruit number and fruit size) and these traits are correlated, and 2) When a focal trait is difficult or expensive to measure on every individual, but other correlated traits are more readily available (Thompson and Meyer 1986; Pszczola *et al.* 2013; Lado *et al.* 2018). While multi-trait models are clearly necessary in the first setting, in the second the value of the secondary traits depends on several factors including i) the repeatability of the focal and secondary traits, ii) the correlations among the traits and the cause of the correlations (i.e. genetic vs non-genetic), and iii) the relative expenses of collecting data on each trait.

Here we focus on the goal of predicting a single focal trait using information from both genetic markers (or pedigrees) and phenotypic information on other traits. Even within this context, there are also two distinct prediction settings: 1) Predicting the focal trait value for new individuals that are yet to be phenotyped for any of the traits, and 2) Predicting the focal trait value for individuals that have been partially phenotyped; phenotypic values for the secondary traits are known and we wish to predict the individual’s genetic value for the focal trait. These settings were described by (Burgueño *et al.* 2012) as CV1 and CV2, respectively, although those authors focused on multi-environment trials rather than single experiments with multiple traits per individual. The same naming scheme has since been extended to the more general multiple-trait prediction scenarios (Lado *et al.* 2018).

The key difference between CV1 and CV2-style multi-trait prediction is that in the former, the secondary traits help refine estimates of the genetic values of relatives of the individuals we wish to predict, while in the latter, the secondary traits provide information directly about the genetics of the target individuals themselves. This direct information on the target individuals is generally useful (as we demonstrate below). However, it comes with a cost for the evaluation of prediction accuracy by cross-validation. Since we do not know the true genetic values for the testing individuals, we must either use a model to estimate the genetic values or simply use their phenotypic value as a proxy. Unfortunately, if we use our genetic model to estimate these values, we are breaking the independence between the testing and training data, and therefore have biased estimates of cross-validation accuracy. On the other hand, if we simply use the phenotypic values of the focal trait as our predictand, these may be biased towards or away from the true genetic values depending on the non-genetic correlation between the focal and secondary traits. This leads to either over- or under-estimation of the prediction accuracy of our multi-trait models. In realistic scenarios, this can lead users to select worse models.

## MATERIALS AND METHODS

We used a simulation study to explore conditions when naive cross-validation experiments as described above lead to sub-optimal choices between single and multi-trait genomic prediction methods. Our simulations were designed to mimic the process of using cross-validation to compare single and multi-trait models based

183 on their prediction accuracies. We repeated this simulation across  
 184 scenarios with different genetic architectures for two traits: a single  
 185 “focal” trait and a single “secondary” trait. Specifically, we modified  
 186 the heritability and correlation structure of the two traits. These  
 187 are the most important parameters for determining the relative  
 188 efficiencies of single- and multi-trait prediction models (Thompson  
 189 and Meyer 1986). Sample size and level of genomic relatedness  
 190 will also affect the comparisons, but are likely to only quantita-  
 191 tively (but not qualitatively) change the relative performances of  
 192 the models and the accuracy of cross-validation.

To make our simulations realistic, we based them on genomic marker data from 803 lines from a real wheat breeding program (Lopez-Cruz *et al.* 2015). We downloaded the genomic relationship matrix  $\mathbf{K}$  based on 14,217 GBS markers from this population. We used this relationship matrix to generate a set of simulated datasets covering all combinations of the following parameters: the relative proportions of genetic and non-genetic variation for each trait ( $h^2 = \{0.2, 0.6\}$ ), and the genetic and non-genetic correlations between the traits  $\rho_g = \{0, 0.3, 0.6\}$ ,  $\rho_R = \{-0.6, -0.4, -0.2, 0, 0.2, 0.4, 0.6\}$ , drawing trait values for each simulation from multivariate normal distributions. In particular, we set:

$$\begin{aligned} \mathbf{Y} &= \mathbf{U} + \mathbf{E}, & \mathbf{U} &\sim \text{MN}(\mathbf{0}, \mathbf{K}, \mathbf{G}), & \mathbf{E} &\sim \text{MN}(\mathbf{0}, \mathbf{I}_n, \mathbf{R}) \\ \mathbf{G} &= \begin{bmatrix} \mathbf{g}_{11} & \mathbf{g}_{12} \\ \mathbf{g}_{21} & \mathbf{g}_{22} \end{bmatrix} = \begin{bmatrix} h_1^2 & \rho_g h_1 h_2 \\ \mathbf{g}_{12} & h_2^2 \end{bmatrix} \\ \mathbf{R} &= \begin{bmatrix} \mathbf{r}_{11} & \mathbf{r}_{12} \\ \mathbf{r}_{21} & \mathbf{r}_{22} \end{bmatrix} = \begin{bmatrix} (1 - h_1^2) & \rho_R \sqrt{(1 - h_1^2)(1 - h_2^2)} \\ \mathbf{r}_{12} & (1 - h_2^2) \end{bmatrix} \end{aligned} \quad (1)$$

193 where  $\text{MN}(\cdot)$  is the Matrix normal distribution,  $\mathbf{Y} = [\mathbf{y}_1, \mathbf{y}_2]$  are  
 194 the phenotypic values for the two traits in the  $n$  individuals,  $\mathbf{U} =$   
 195  $[\mathbf{u}_1, \mathbf{u}_2]$  are the true genetic values for the two traits, and  $\mathbf{E} =$   
 196  $[\mathbf{e}_1, \mathbf{e}_2]$  are the true non-genetic deviations for the two traits. We  
 197 repeated this process 500 times for each of the 42 combinations of  
 198 the genetic architecture parameters. To improve the consistency of  
 199 the simulations, we used the same draws from a standard-normal  
 200 distribution for all 42 parameter combinations, but new draws for  
 201 each of the 500 simulations.

After creating the 803 simulated individuals, we randomly divided them into a training partition and a testing partition. We arranged the rows of  $\mathbf{Y}$  so that the testing individuals were first,

and correspondingly partitioned  $\mathbf{K}$  into:

$$\mathbf{K} = \begin{bmatrix} \mathbf{K}_{nn} & \mathbf{K}_{no} \\ \mathbf{K}_{on} & \mathbf{K}_{oo} \end{bmatrix}. \quad (2)$$

202 Here and below, the subscript  $n$  refers to the testing partition (i.e.  
 203 “new” individuals) and the subscript  $o$  refers to the training parti-  
 204 tion (i.e. “old” individuals). We use the hat symbol ( $\hat{\cdot}$ ) to denote  
 205 parameter estimates or predictions.

206 We then fit single- and multi-trait linear mixed models to the  
 207 training data and used these model fits to predict the genetic values  
 208 for the focal trait (trait 1) in the testing partition.

Specifically, for the single-trait method we fit a univariate linear mixed model to the training data  $\mathbf{y}_{o1}$ :

$$\mathbf{y}_{o1} = \mu_1 + \mathbf{u}_{o1} + \mathbf{e}_{o1}, \quad \mathbf{u}_{o1} \sim \text{N}(0, \mathbf{g}_{11} \mathbf{K}_{oo}), \quad \mathbf{e}_{o1} \sim \text{N}(0, \mathbf{r}_{11} \mathbf{I}_{n_o}) \quad (3)$$

by Restricted Maximum Likelihood using the `remlmer` function of R package (Ziyatdinov *et al.* 2018) and extracted the BLUPs  $\hat{\mathbf{u}}_{o1}$ . Note: an expanded version of these derivations are provided in the Appendix. We then calculated predicted genetic values for the testing partition  $\mathbf{u}_{n1}$  as:

$$\hat{\mathbf{u}}_{n1}^{(1)} | \hat{\mathbf{u}}_{o1} = \mathbf{K}_{no} \mathbf{K}_{oo}^{-1} \hat{\mathbf{u}}_{o1}. \quad (4)$$

For the multi-trait model, we stacked the vectors of the two traits in the training dataset into the vector  $\mathbf{y}_o = \begin{bmatrix} \mathbf{y}_{o1} \\ \mathbf{y}_{o2} \end{bmatrix}$  and fit:

$$\mathbf{y}_o = \boldsymbol{\mu} + \mathbf{u}_o + \mathbf{e}_o, \quad \mathbf{u}_o \sim \text{N}(\mathbf{0}, \mathbf{G} \otimes \mathbf{K}_{oo}), \quad \mathbf{e}_o \sim \text{N}(\mathbf{0}, \mathbf{R} \otimes \mathbf{I}_{n_o}) \quad (5)$$

209 using the `remlmer` function, extracted estimates  $\hat{\boldsymbol{\mu}} = [\hat{\mu}_1^\top, \hat{\mu}_2^\top]^\top$ ,  
 210  $\hat{\mathbf{G}}$ ,  $\hat{\mathbf{R}}$ , and BLUPs  $\hat{\mathbf{u}}_o$ .

To make predictions of the genetic values for the focal trait in the testing partition in the CV1 case without use of  $\mathbf{y}_{n2}$ , we calculated:

$$\hat{\mathbf{u}}_{n1}^{(2)} | \hat{\mathbf{u}}_{o1} = \mathbf{K}_{no} \mathbf{K}_{oo}^{-1} \hat{\mathbf{u}}_{o1} \quad (6)$$

211 which has the same form as for the single trait model, but the input  
 212 BLUPs  $\hat{\mathbf{u}}_{o1}$  are different.

To make predictions of the genetic values for the focal trait in the testing partition in the CV2 case, using the phenotypic observations of the secondary trait  $\mathbf{y}_{n2}$ , we used a two step method. First, we

estimated  $\hat{\mathbf{u}}_o$  above based on both traits in the training data. Then we combined these estimates with the observed phenotypes of the testing data to calculate genetic predictions for the testing data:

$$\hat{\mathbf{u}}_{n1}^{(3)} | \mathbf{y}_{n2}, \hat{\mathbf{u}}_o = \mathbf{K}_{no} \mathbf{K}_{oo}^{-1} \hat{\mathbf{u}}_{o1} + \hat{\mathbf{g}}_{12} (\mathbf{K}^{-1})_{nn} (\hat{\mathbf{V}}_c)^{-1} (\mathbf{y}_{n2} - \hat{\mu}_2 - \mathbf{K}_{no} \mathbf{K}_{oo}^{-1} \hat{\mathbf{u}}_{o2}), \quad (7)$$

where  $\hat{\mathbf{V}}_c = \hat{\mathbf{g}}_{22} (\mathbf{K}^{-1})_{nn} + \hat{\mathbf{r}}_{22} \mathbf{I}_n$ . This two-step method will be slightly less accurate than a one-step method that used  $\mathbf{y}_{n2}$  during the estimation of  $\hat{\mathbf{u}}_o$ , but is much easier to implement in breeding programs because no genotype or phenotype data of the evaluation individuals is needed during the model training stage.

We measured the accuracy of these three predictions by calculating the correlation between the prediction  $\hat{\mathbf{u}}_{n1}^{(i)}$  and three predictands over the 500 simulations:

- $\mathbf{u}_{n1}$ : The true genetic value.
- $\mathbf{y}_{n1}$ : The phenotypic values of the testing individuals.
- $\hat{\mathbf{u}}_{n1}$ : The estimated genetic values of the validation individuals using the full dataset (including  $\mathbf{y}_{n1}$ ).

For the second accuracy measure that uses phenotypic values as predictands, we “corrected” the correlations by dividing by the true value of  $\sqrt{h^2}$  to account for the larger variance of  $\mathbf{y}_{n1}$  relative to  $\mathbf{u}_{n1}$ . This impacts the denominator of the correlation (Daetwyler *et al.* 2013), but since it is the same across methods, does not impact their comparison.

As described below, we also simulated phenotypes for an additional set of individuals  $\mathbf{y}_x$  not included in either the validation or testing partitions. These individuals were selected to be close relatives of each of the validation partition individuals but experienced different micro-environments.

For each combination of genetic parameters, we declared the “best” prediction method to be the one with the highest average correlation with the true genetic values across the 500 simulations. Then we counted the proportion of the simulations in which this “best” method actually had the highest estimated accuracy when scored against  $\mathbf{y}_{n1}$ .

#### Data availability

Scripts for running all simulations and analyses described here are available at [https://github.com/deruncie/multiTrait\\_crossValidation\\_scripts](https://github.com/deruncie/multiTrait_crossValidation_scripts).

## RESULTS

Although we ran simulations for two levels of heritability for the focal trait ( $h_1^2 = \{0.2, 0.6\}$ ) we present results only for  $h_1^2 = 0.2$ . This is the “most-difficult” setting for prediction—when the heritability of the trait is low—but also the setting when we would expect the greatest benefit of using multi-trait models. Results for  $h_1^2 = 0.6$  were qualitatively similar, but with higher overall prediction accuracies of all methods.

### Accuracy of single and multi-trait methods in simulated data

With  $h_1^2 = 0.2$  the true accuracy of prediction was moderate for all methods ( $\text{cor}(\hat{\mathbf{u}}_{n1}, \mathbf{u}_{n1}) \sim 0.4 - 0.6$ , Figure 1). Prediction accuracies for the single-trait method were constant across settings with different correlation structures because information from the secondary trait was not used.

The “standard” multi-trait model (i.e. CV1-style) that used phenotypic information only on the training partition slightly outperformed the single-trait model in some settings, more-so when the genetic and non-genetic correlations between traits were large and opposing and when the genetic determinacy of the secondary trait was high (Thompson and Meyer 1986). However it performed slightly worse whenever the genetic and residual correlations between traits were low. This was caused by inaccuracy in the estimation of the two covariance parameters ( $\hat{\mathbf{g}}_{12}, \hat{\mathbf{r}}_{12}$ ). Neither multi-trait model performed worse than the single-trait model when the true  $\mathbf{G}$  and  $\mathbf{R}$  matrices were used Supplemental Figure 1, which we also verified by calculating the expected prediction accuracies analytically (See Appendix). In real data, multi-trait models require estimating more (co)variance parameters and therefore can show reduced performance when data are limited.

The CV2-style multi-trait method, which leverages additional phenotypic information on the secondary trait from the testing partition itself, showed dramatic improvements in prediction accuracy whenever genetic correlations among traits were large, irregardless of the non-genetic correlation between the traits. This is similar to the benefits seen by (Rutkoski *et al.* 2016) and (Lado *et al.* 2018). When the heritability of the secondary trait was high, the improvement in prediction accuracy was particularly dramatic (increasing to  $\sim \rho = 0.6$ ). This is the potential advantage of incorporating secondary traits into prediction methods. However, the CV2 method also requires estimating  $\mathbf{G}$  and  $\mathbf{R}$ , and its performance was lower than the single-trait method whenever both genetic and residual

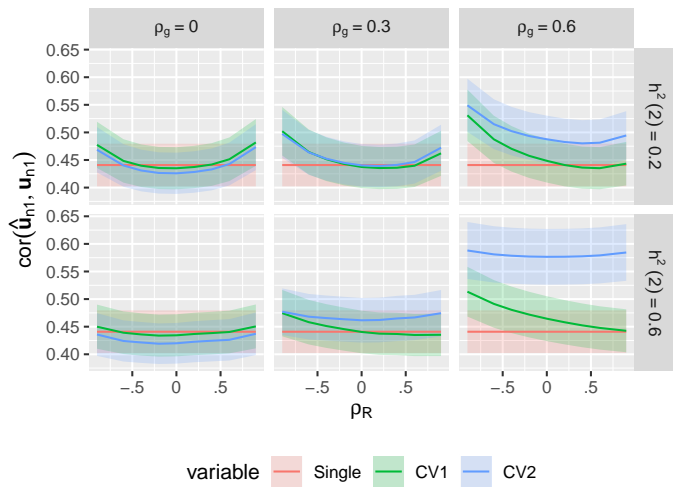

**Figure 1** True prediction accuracy of single-trait and multi-trait prediction methods in simulated data. 500 simulations were run for each heritability of the secondary trait ( $h_2^2 = \{0.2, 0.6\}$ ), and each combination of genetic and non-genetic correlation between the two traits ( $\rho_g = \{0, 0.3, 0.6\}$ ,  $\rho_R = \{-0.6, -0.4, -0.2, 0, 0.2, 0.4, 0.6\}$ ), all with  $h_1^2 = 0.2$ . For each simulation, we used 90% of the individuals as training to fit linear mixed models (either single or multi-trait), predicted the genetic values of the remaining validation individuals, and then measured the Pearson's correlation between the predicted ( $\hat{\mathbf{u}}_{n1}$ ) and true ( $\mathbf{u}_{n1}$ ) genetic values. In the CV1 method, we used only information on the training individuals to calculate  $\hat{\mathbf{u}}_{n1}$ . In the CV2 method, we used the training individuals to calculate  $\hat{\mathbf{u}}_o$  and combined this with the observed phenotypes for the secondary trait on the validation individuals ( $\mathbf{y}_{n2}$ ). Curves show the average correlation for each method across the 500 simulations. Ribbons show  $\pm 1.96 \times SE$  over the 500 simulations.

287 correlations were low.

288 Therefore, multi-trait methods will not always be useful and  
 289 it is important to test the relative performance of the different  
 290 methods in real breeding scenarios. Unfortunately, we never know  
 291 the true genetic values ( $\mathbf{u}_{n1}$ ), and so must use proxy predictands to  
 292 evaluate our methods in real data (Daetwyler *et al.* 2013; Legarra  
 293 and Reverter 2018). In Figures 2A-B, we compare the prediction  
 294 accuracies of the three methods using two candidate predictands:  
 295 the observed phenotypic values ( $\mathbf{y}_{n1}$ ) and estimated genetic values  
 296 from a joint model fit to the complete dataset ( $\hat{\mathbf{u}}_{n1}$ ).

297 Using the observed phenotypic values ( $\mathbf{y}_{n1}$ ) as the predictand,  
 298 the estimated accuracy of both the single-trait and CV1-style multi-  
 299 trait prediction methods consistently under-estimated their true  
 300 prediction accuracies. This is expected because in this setting  
 301 80% of the phenotypic variation is non-genetic and cannot be  
 302 predicted based on relatives alone. We therefore follow common  
 303 practice to report a "corrected" estimate of the prediction accuracy  
 304 by dividing by  $\sqrt{\hat{h}^2}$  in Figure 2A. This correction factor itself must  
 305 be estimated in real data, but when comparing models the same  
 306 value of  $\hat{h}^2$  should be used for each model so that differences in  
 307 these estimates do not bias model selection.

308 In contrast, the estimated accuracy of the CV2-style multi-trait  
 309 method varied dramatically across simulated datasets. We tended  
 310 to overestimate the true accuracy when both genetic and non-  
 311 genetic correlations were large and in the same direction, and  
 312 dramatically underestimate the true accuracy when the two corre-  
 313 lations were opposing. Importantly, there are situations where the  
 314 CV2-style method appears to perform worse than the single-trait  
 315 method based on  $\mathbf{y}_{n1}$  but actually performs better. Therefore, the  
 316 observed phenotypic values are not reliable predictands to evalu-  
 317 ate CV2-style methods when the intent is to estimate true genetic  
 318 values and  $\rho_R \neq 0$ .

319 On the other hand, using estimated genetic values from a joint  
 320 model fit to the complete dataset ( $\hat{\mathbf{u}}_{n1}$ ) as the predictand led to  
 321 dramatic over-estimation of the true prediction accuracy for all  
 322 methods. This is also expected because the training data are used  
 323 both to train the prediction model *and also* to create the testing  
 324 dataset, a clear violation of the cross-validation rules that these  
 325 datasets must be kept separate at all stages of the analysis. Again,  
 326 the bias was most severe for the CV2-style method. Since this  
 327 method is clearly invalid, we do not consider it further.

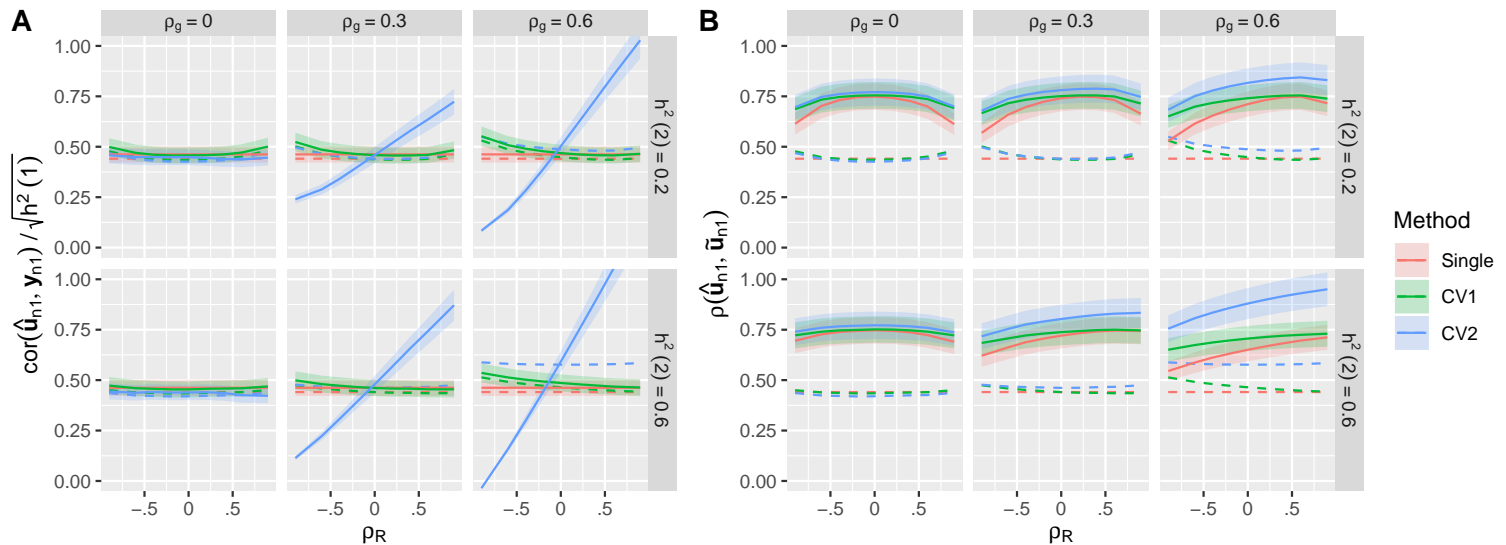

**Figure 2** Estimated prediction accuracies based on candidate predictands. For the same set of simulations described in Figure 1, we estimated the prediction accuracies of the three methods using two different candidate predictands: **(A)** The observed phenotypic value  $y_{n1}$  for each training individual (with the correlation corrected by  $1/\sqrt{h_1^2}$ ), or **(B)** An estimate of the genetic value of each training individual based on BLUPs calculated using the complete phenotype data ( $\hat{u}_{n1}$ ). Solid lines in each panel show the average *estimated* accuracy for each method across the 500 simulations. Ribbons show  $\pm 1.96 \times SE$  over the 500 simulations. Dotted lines show the average *true* accuracy from Figure 1.

### 328 Effects of predictand on model selection

329 To demonstrate the impact of biased estimates of model accuracy  
 330 using  $y_{n1}$  on the effectiveness of model selection, we assessed in  
 331 each simulation whether the single-trait or multi-trait methods  
 332 had a higher *estimated* accuracy, and compared this result to the  
 333 *true* difference in prediction accuracies in that simulation setting.

334 Figure 3 shows that selecting between the single-trait and CV1-  
 335 style multi-trait models based on estimated accuracy using  $y_{n1}$   
 336 generally works well. Whenever one method is clearly better, we  
 337 are able to choose that method  $> 50\%$  of the time. But we never  
 338 choose correctly  $< 50\%$  of the time, even when the methods are  
 339 approximately equivalent.

340 In contrast, when selecting between the single-trait and CV2-  
 341 style multi-trait methods based on estimated accuracy using  $y_{n1}$ ,  
 342 the differential bias in estimated accuracy between the two meth-  
 343 ods frequently lead to sub-optimal model selection (Figure 3B).  
 344 With opposing genetic and non-genetic covariances between the  
 345 two traits, the better model was chosen  $< 10\%$  of the time. In these  
 346 situations, using  $y_{n1}$  to select a prediction method will obscure  
 347 real opportunities to enhance prediction accuracy using multi-trait  
 348 prediction models.

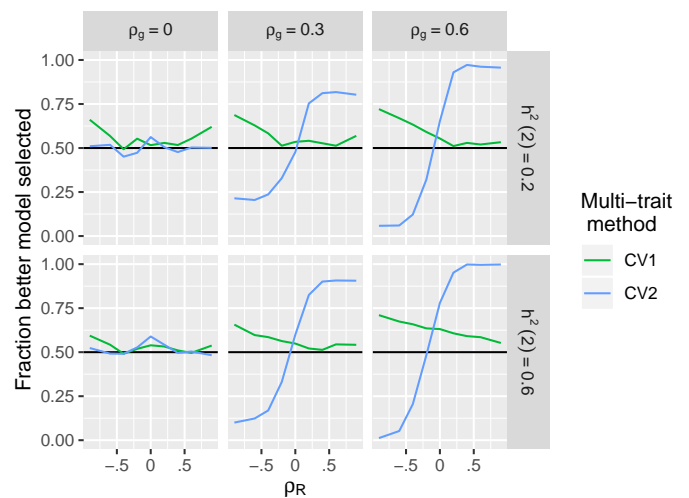

**Figure 3** Impact of using phenotypic data to select between single-trait and multi-trait prediction methods. For each of the 500 simulations per genetic architecture described in Figure 1, we compared the estimated accuracy of a multi-trait prediction to the single-trait prediction. We then calculated the fraction of times that the selected model had higher average true accuracy in that setting (as shown in Figure 1).

### Alternative estimates of multi-trait prediction accuracy

The CV2-style prediction method can be powerful because  $\mathbf{y}_{n2}$  provides information on the genetic value of the testing individuals themselves (through  $\mathbf{u}_{n2}$ ), while  $\mathbf{y}_{o1}$  only provides indirect information on the genetic values of the testing individuals through the relatives. However, estimating prediction accuracy using  $\mathbf{y}_{n1}$  fails for the CV2-style prediction method because both the focal and secondary traits are observed on the same individual and therefore share the same non-genetic sources of variation. Since the CV2 method uses  $\mathbf{y}_{n2}$ , non-genetic deviations for the secondary trait  $\mathbf{e}_{n2}$  push  $\hat{\mathbf{u}}_{n1}$  either towards or away from  $\mathbf{y}_{n1}$  depending on the estimated correlation  $\hat{r}_{12}$ . This either inflates or deflates the estimated accuracy, leading to incorrect model choices.

We now compare the effectiveness of three strategies for estimating cross-validation accuracy of CV2-style methods. To our knowledge, the second and third strategies are novel. Because the three methods have different data requirements, we implemented different experimental designs for each evaluation strategy.

**Parametric estimate of accuracy.** Our prediction  $\hat{\mathbf{u}}_{n1}$  is similar to a selection index because it combines multiple pieces of information into a linear prediction. The accuracy of an index  $\mathbf{I}$  is:  $cor_g(\mathbf{I}, \mathbf{y}) \sqrt{h_1^2}$ , the genetic correlation between the index and phenotype multiplied by the heritability of the index (Falconer and Mackay 1996; Lopez-Cruz et al. 2019). Neither the genetic correlation nor the heritability can be directly observed, but we can estimate both as parameters of a multi-trait linear mixed model with the same form as (5). To be a valid cross-validation score, these parameters must be estimated with data only in the validation partition, rather than reusing estimates from model training. Since both model training and model evaluation equally require estimates of  $\mathbf{G}$  and  $\mathbf{R}$ , we divided the data 50:50 into training and validation partitions in each simulation, thus using 404 lines to train the prediction models and 403 lines to evaluate the prediction accuracy.

The parametric estimates of prediction accuracy for the CV2 method were less biased than the  $cor(\hat{\mathbf{u}}_{n1}^{(3)}, \mathbf{y}_{n1})$ , the non-parametric estimates using  $\mathbf{y}_{n1}$  as a predictand (Figure 4A, compare to Figure 2). This led to more consistent model selections between the CV2 and single-trait methods (Figure 4B). However, the parametric approach still underestimated the accuracy of the CV2 method when the genetic and residual correlations were in

opposite directions, leading to model selection accuracies <50%. This negative bias was due to poor estimation of  $\mathbf{G}$  and  $\mathbf{R}$  for the selection indices, given the limited sample sizes remaining after the data were partitioned.

**Semi-parametric estimate of accuracy.** In principle, we can correct for the bias in the non-parametric accuracy estimate ( $cor(\hat{\mathbf{u}}_{n1}^{(3)}, \mathbf{y}_{n1})$ ) from the CV2-style method by calculating an adjustment factor based on the theoretical bias relative to the true accuracy ( $cor(\hat{\mathbf{u}}_{n1}^{(3)}, \mathbf{u}_{n1})$ ). This is similar to the semi-parametric accuracy estimates presented by (Legarra and Reverter 2018), and the “correction” of accuracy estimates by  $1/\sqrt{h^2}$  used above to account for the difference in variance between  $\mathbf{y}_{n1}$  and  $\mathbf{u}_{n1}$ . As we derive in the Appendix, the difference between the true correlation from a CV2-style methods and its CV2 cross-validation estimate when a single secondary trait is used is:

$$\frac{\hat{\mathbf{g}}_{12}\mathbf{r}_{21}}{\sqrt{var(\hat{\mathbf{u}}_{n1}^{(3)})var(\mathbf{y}_{n1})}} \frac{tr(\mathbf{S}(\mathbf{K}^{-1})_{nn}\hat{\mathbf{V}}_c^{-1}\mathbf{K}_{nn})}{n-1}. \quad (8)$$

with  $\mathbf{V}_c$  defined above and  $\mathbf{S} = \mathbf{I} - \frac{\mathbf{1}\mathbf{1}'}{n}$ . The bias is a function of the the correlation among traits through the product  $\hat{\mathbf{g}}_{12}\mathbf{r}_{21}$  (as the second term does not involve these parameters, and in most cases is  $\approx 1$ ), and is large and positive (i.e. accuracy is overestimated) when  $\hat{\mathbf{g}}_{12}$  and  $\mathbf{r}_{12}$  are large and in the same direction, and large and negative (i.e. accuracy is underestimated) when these covariances are in opposite directions. Given this result, we can correct  $cor(\hat{\mathbf{u}}_{n1}^{(3)}, \mathbf{y}_{n1})$  by subtracting 8 from the estimated correlation, again corrected by  $1/\sqrt{h^2}$  (Figure 5).

Clearly, the quality of this correction will depend on the accuracy of  $\hat{\mathbf{g}}_{12}$  and  $\hat{r}_{12}$  as estimates of  $\mathbf{g}_{12}$  and  $\mathbf{r}_{12}$ . In Figure 5A, we show that the corrected correlation estimate has greatly reduced bias, particularly the dependence of the bias on the non-genetic covariance between the traits  $\mathbf{r}_{12}$ . However the correction is not perfect. Corrected accuracy estimates tend to overestimate the true accuracy. This over-estimation is caused by error in  $\hat{\mathbf{G}}$  and  $\hat{\mathbf{R}}$  as estimates of the true covariances: The correction factor is nearly perfect when the true covariance matrices are used in place of their estimates Supplemental Figure 2.

Using the semi-parametric accuracy estimates, we are more successful at selecting the best model over the range of genetic architectures (Figure 5B). The frequency of selecting the correct model rarely drops below 50% and is relatively constant with respect to the residual correlation between traits.



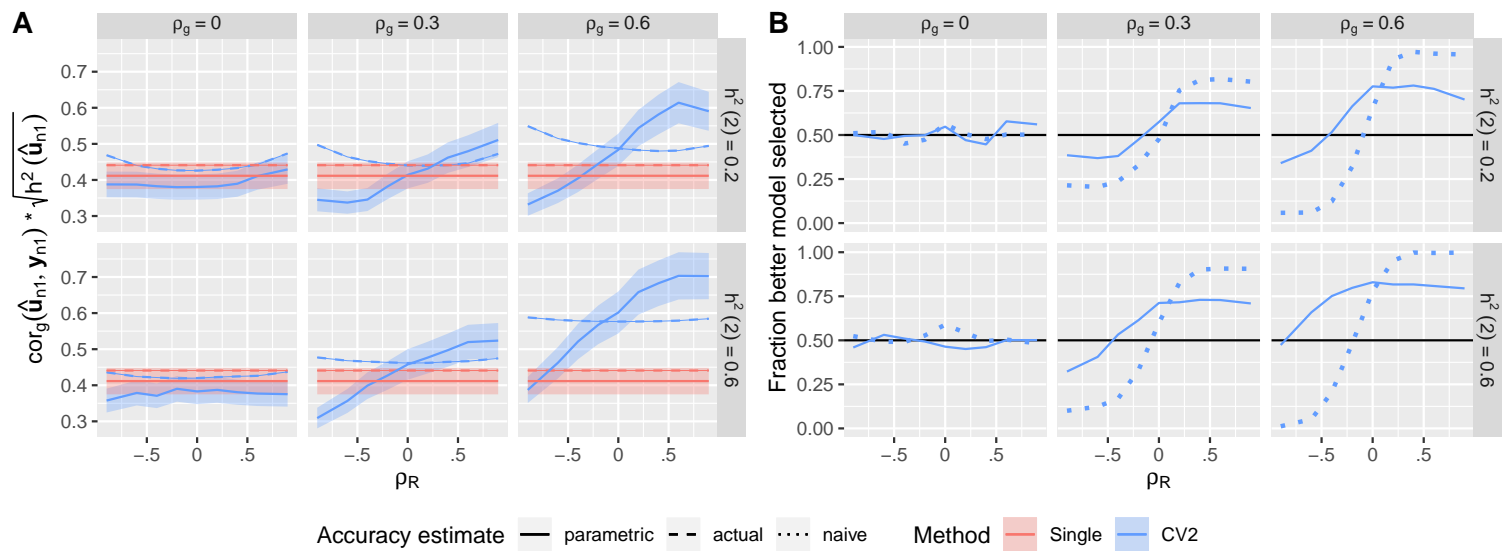

**Figure 4 Parametric accuracy estimates.** Estimated prediction accuracies and model selection accuracies for CV2-style methods using the parametric method. **(A)** Solid curves: estimates of prediction accuracy. Dashed curves: true prediction accuracy based on  $\mathbf{u}_{n1}$ . Dotted curves: estimated prediction accuracy using  $\mathbf{y}_{n1}$  from Figure 2A. Ribbons show  $\pm 1.96 \times SE$  over the 500 simulations. **(B)** Solid curves: Fraction of the 500 simulations in which the better method (between CV2 and single-trait) for predicting the true genetic values was correctly selected. Dotted curve: model selection based on the naive prediction accuracy.

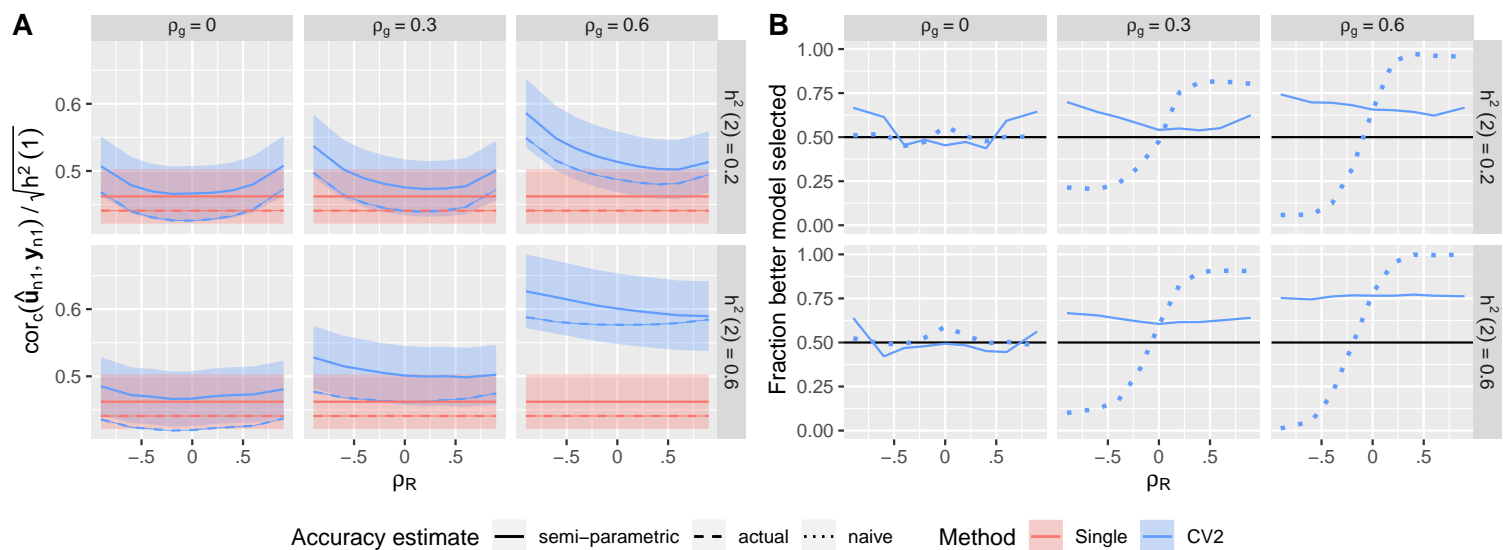

**Figure 5 Semi-parametric accuracy estimates.** Estimated prediction accuracies and model selection accuracies for CV2-style methods after semi-parametric correction. **(A)** Solid curves: corrected estimates of prediction accuracy. Dashed curves: uncorrected estimates of prediction accuracy based on  $\mathbf{y}_{n1}$  (mirroring Figure 3). Dotted curves: true prediction accuracy. Ribbons show  $\pm 1.96 \times SE$  over the 500 simulations. **(B)** Solid curves: Fraction of the 500 simulations in which the better method (between CV2 and single-trait) for predicting the true genetic values was correctly selected. Dotted curve: model selection based on the naive un-corrected prediction accuracy.

418 **CV2\* cross-validation strategy.** Since the biased estimate of pre- 460  
419 diction accuracy for CV2-style methods is due to non-genetic cor- 461  
420 relations between  $y_{n2}$  used for prediction and the predictand  $y_{n1}$ , 462  
421 an alternative strategy, which we call CV2\*, is to use phenotypic 463  
422 information on close relatives of the testing individuals ( $y_{x1}$ ) to 464  
423 validate the model predictions in place of their own focal trait 465  
424 phenotypes ( $y_{n1}$ ). These “surrogate” validation individuals must 466  
425 also be excluded from the model training and raised so that they 467  
426 do not share the same non-genetic deviations as the testing indi- 468  
427 viduals:  $cor(\mathbf{e}_{x1}, \mathbf{e}_{n1}) = 0$ . Therefore,  $\hat{\mathbf{u}}_{x1}$  will not be artificially 469  
428 pushed towards or away from  $\mathbf{u}_{x1}$  (measured on relatives) by  $y_{n2}$  470  
429 (measured on testing individuals), preventing this source of bias 471  
430 in the estimated accuracy. 472

431 We implemented the CV2\* cross-validation strategy in two 473  
432 ways, simulating two different breeding schemes. 474

433 First, we considered the situation common in plant breeding 475  
434 where inbred lines (i.e. clones) are tested, and each line is grown 476  
435 in several plots in a field [Bernardo \(2002\)](#). Here, we can use one 477  
436 set of clones for prediction ( $y_{n2}$ ), and the other set of clones as 478  
437 trait-1 surrogates ( $y_{x1}$ ). Since they are clones,  $\mathbf{u}_{x1} = \mathbf{u}_{n1}$  and  $y_{n2}$  479  
438 is just as good for predicting  $\mathbf{u}_{x1}$  as  $y_{x2}$ . Generally in this type of 480  
439 experiment, replicate plots of each line will be combined prior to 481  
440 analysis into a single line mean (or BLUP). But since we require 482  
441  $y_{n2}$  and  $y_{x1}$  to be recorded from separate individuals, each value 483  
442 will have  $2\times$  the residual variance because it is based on  $1/2$  as 484  
443 much data as the line means used for model training. Therefore, 485  
444 in our simulations we drew two independent residual values for 486  
445 each line in the validation partition, each with a variance of  $2R$ . 487  
446 For these simulations, we used a 90:10 training:validation split. 488

447 Second, we considered the situation more common in animal 489  
448 breeding where clones are not available. In this case, the best op- 490  
449 tion for CV2\* would be to select pairs of closely related individuals 491  
450 to include in the training set; we use the first individual of the 492  
451 pair as  $y_{n2}$  and the second as  $y_{x1}$ . To implement this strategy, we 493  
452 again started with a validation partition of 10% of the lines. Then 494  
453 for each line, we selected the most closely related remaining line 495  
454 ( $\arg \max_j \mathbf{K}_{ij}$  for validation line  $i$ ) and held this additional set of 496  
455 10% of the lines as  $y_{x1}$ . This left a training partition with only 80% 497  
456 of the lines. The average genetic relatedness of validation partition 498  
457 pairs in these simulations was 0.38. 499

458 Figure 6A shows that for the first setting with split clones, es- 500  
459 timates of prediction accuracy for CV2-style predictions by CV2\*

are vastly more accurate than the naive estimates based on  $y_{n1}$ ,  
but they are slightly downwardly biased because of the increased  
residual variance of  $y_{n1}$  and  $y_{x2}$ . Model selection works fairly  
well across all settings when clones are used (Figure 6B, blue  
lines), although with slightly lower success rates than for the semi-  
parametric method. However, when we implementing the second  
approach with nearest relatives (not clones), model selection was  
rarely successful - we consistently chose the wrong model across  
most simulation settings unless the genetic and residual correla-  
tions were opposing. This is because the validation pairs were  
too distantly related to provide any additional information on  
genetic merit relative to individuals in the training partition. In-  
terestingly, this method is relatively successful in the situations  
where the parametric method fails (see Figure 4B), and so may be  
complimentary.

## 475 DISCUSSION

476 Our study highlights a potential pitfall in using cross-validation to  
477 estimate the accuracy of multi-trait genomic prediction methods.  
478 When secondary traits are used to aid in the prediction of focal  
479 traits and these secondary traits are measured on the individuals  
480 to be tested, cross-validation evaluated against phenotypic obser-  
481 vations can be severely biased and result in poor model choices.  
482 Unfortunately, we rarely know the true genetic value of any indi-  
483 vidual and therefore can only evaluate our models with phenotypic  
484 data (since multi-trait-derived estimated genetic values are even  
485 more severely biased as we demonstrated above (Figure 2B)). We  
486 cannot find earlier discussions of this problem in the literature.  
487 However a growing number of studies aim to use cheap or early-  
488 life traits to improve predictions of genetic worth for individuals  
489 in later-life traits (ex. [Pszczola et al. 2013](#); [Rutkoski et al. 2016](#); [Fer-  
490 nandes et al. 2017](#); [Lado et al. 2018](#)). Therefore the issue is becoming  
491 more important.

The problematic bias in the cross-validation-based accuracy  
estimates is caused by non-genetic correlations between the pre-  
dictors that we want to use (i.e. the secondary traits) and our best  
predictand (the phenotypic value of the trait in the testing indi-  
viduals) – non-genetic correlations between two traits measured  
on the same individual are expected. However, in some cases this  
correlation is zero by construction, and standard cross-validation  
approaches can be valid. For example, in the original description  
of the CV2 cross-validation method by ([Burgueño et al. 2012](#)), each

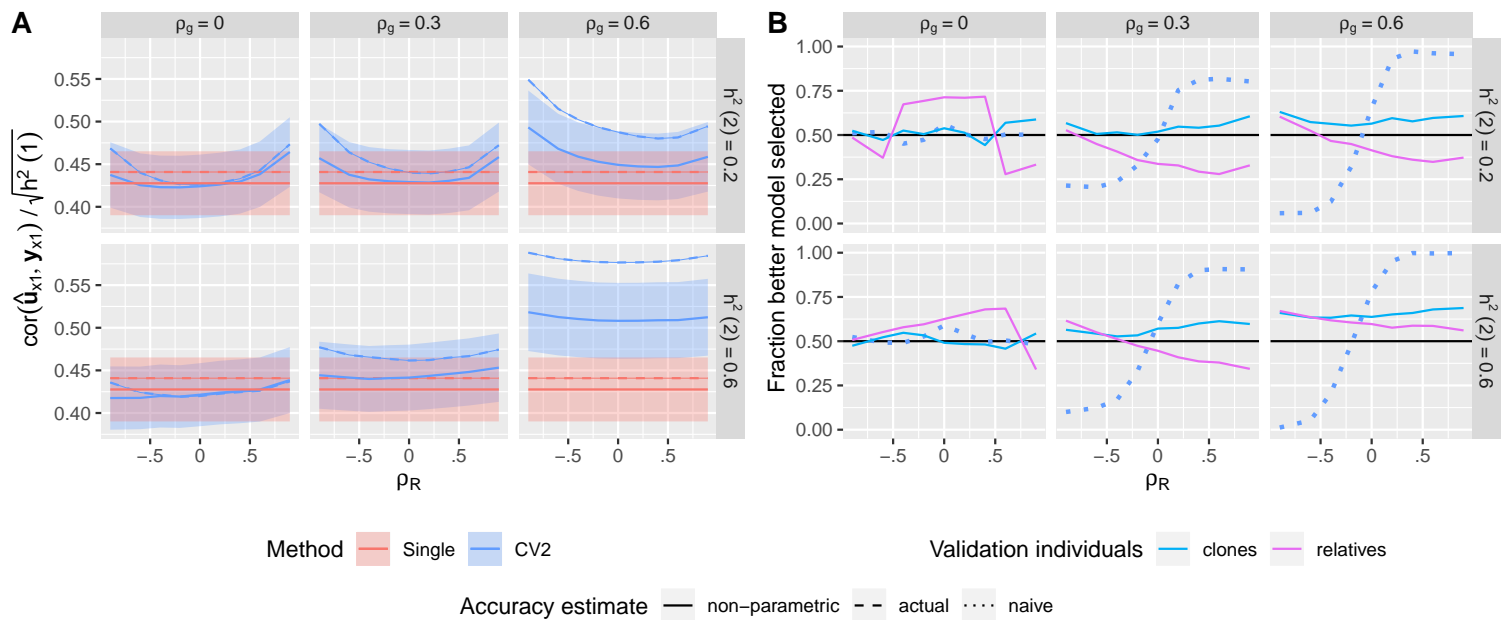

**Figure 6 Non-parametric CV\* accuracy estimates.** Estimated prediction accuracies and model selection accuracies based on the phenotypic values of close relatives. **(A)** Solid curves: Estimated prediction accuracies of the CV2-style and Single-trait methods evaluated against  $y_{x1}$  using clones. Dashed curves: True prediction accuracies of each method. Ribbons show  $\pm 1.96 \times SE$  over the 500 simulations. **(B)** Solid curves: Fraction of the 500 simulations in which the better method (between CV2 and single-trait) for predicting the true genetic values was correctly selected based on the phenotypes of relatives of the testing individuals. Dotted curve: Fraction of correct models selected based on the naive estimator.

501 trait was measured in a different environment. In this case, the  
 502 traits were measured on different individuals and therefore did  
 503 not share any non-genetic correlation. Also, CV1-style methods  
 504 do not suffer from this problem because phenotypic information  
 505 on the secondary traits *in the testing individuals* is not used for  
 506 prediction. Similarly, this bias does not occur when the target of  
 507 prediction is the phenotypic value itself (rather than the individ-  
 508 ual's genetic value). For example, in medical genetics the aim is  
 509 to predict whether or not a person will get a disease or not, not  
 510 her genetic propensity to get a disease had she been raised in a  
 511 different environment (ex [Spiliopoulou et al. 2015](#); [Dahl et al. 2016](#)).

512 We note that the common strategy of two-step genome selection:  
 513 using single-trait methods to calculate estimated genetic values  
 514 for each line:trait and then using these estimated genetic values  
 515 as training (and validation) data, does not get around the prob-  
 516 lem identified here. Using estimated genetic values instead of  
 517 phenotypic values will tend to increase the genetic repeatability  
 518 of the training and validation values, and therefore increase the  
 519 overall prediction accuracy of all methods. But these estimated  
 520 genetic values will still be biased by the non-genetic variation, and

521 the biases across traits will still be correlated by the non-genetic  
 522 correlations. Therefore the same issue will arise.

523 Also, while we have used a GBLUP-like genomic prediction  
 524 method for the analyses presented here, the same result will hold  
 525 for any multi-trait prediction method that aims to use information  
 526 from  $y_{n2}$  when there are non-genetic correlations with  $y_{n1}$ , i.e. any  
 527 method that is evaluated with the CV2 cross-validation method  
 528 on multiple traits measured on the same individual ([Calus and  
 529 Veerkamp 2011](#); [Jia and Jannink 2012](#); [Fernandes et al. 2017](#)). This  
 530 includes multi-trait versions of the Bayes Alphabet methods ([Calus  
 531 and Veerkamp 2011](#); [Cheng et al. 2018](#)), or neural network or Deep  
 532 Learning methods ([Montesinos-López et al. 2018](#)).

533 We presented three partial solutions to this problem, spanning  
 534 from fully parametric to fully non-parametric.

535 The parametric solution relies on fitting a new multi-trait mixed  
 536 model to the predicted values and the predictand, with the accu-  
 537 racy estimated as the genetic correlation scaled by the heritability  
 538 of the prediction. This solution is always available as long as the  
 539 individuals in the validation partition have non-zero genomic re-  
 540 latedness and the full dataset is large enough to estimate genetic

541 correlations in both training and validation partitions. However 583  
542 it generally worked poorly in our simulations because  $\mathbf{G}$  and  $\mathbf{R}$  584  
543 were not estimated accurately. It may work better with very large 585  
544 datasets. Also, because this parametric approach relies on the same 586  
545 assumptions about the data (i.e. multivariate normality) as the 587  
546 prediction model, it loses some of the guarantees of reliability that 588  
547 completely non-parametric cross-validation methods can claim. 589

548 The semi-parametric solution aims to correct the non- 590  
549 parametric correlation estimate for the bias caused by the non-null 591  
550 residual correlation among traits. This correction factor is only 592  
551 needed for CV2-style multi-trait prediction approaches, and is sim- 593  
552 ilar to the approach of (Legarra and Reverter 2018) for single-trait 594  
553 models. We show that this correction factor can work well, par- 595  
554 ticularly if the covariances among traits are well estimated. We 596  
555 only derived this correction method for prediction methods based 597  
556 on linear mixed effect models with a single known genetic covari- 598  
557 ance structure (i.e. GBLUP and RKHS-style methods with fixed 599  
558 kernels), although the approximation  $\frac{\hat{\mathbf{g}}_{12}\hat{\mathbf{r}}_{12}}{\sqrt{\text{var}(\hat{\mathbf{u}})\text{var}(\mathbf{u})}}$  will probably 600  
559 be approximately correct for other methods. However, when co- 601  
560 variances are poorly estimated, the correction factor can still lead 602  
561 to biased estimates of model accuracy. We are currently investigat- 603  
562 ing whether Bayesian methods that sample over this uncertainty 604  
563 can be useful, and will implement this method in JWAS (Cheng 605  
564 *et al.* 2018). This method is semi-parametric, so also relies on dis- 606  
565 tributional assumptions about the data and may fail when these 607  
566 assumptions are not met.

567 As a third alternative, we proposed the CV2\* cross-validation 608  
568 method, a fully non-parametric approach for assessing CV2-style 609  
569 multi-trait prediction accuracy. CV2\* uses phenotypic values of 610  
570 the focal trait from relatives of the testing individuals in place of 611  
571 the phenotypic values of that trait from the testing individuals 612  
572 themselves. If the close relatives are raised independently, they 613  
573 will not share non-genetic variation, removing the source of bias in 614  
574 the cross-validation estimate (Figure 6A). The CV2\* method works 615  
575 best when clones of the testing individuals are available. With 616  
576 clones, secondary trait phenotypes of the testing individuals can 617  
577 be used directly to predict focal trait genetic values of their clones 618  
578 because the genetic values are identical. Replicates of inbred lines 619  
579 are frequently used in plant breeding trials (Bernardo 2002). In 620  
580 this case, all replicates should be held-out as a group from the 621  
581 training data. Then the replicates can be partitioned again into 622  
582 two sets; secondary trait phenotypes from one set can be incor-

porated into the genetic value predictions for the lines, and these  
predictions evaluated against the phenotypic values of the other  
set. To compare this estimate of CV2-style prediction accuracy to  
the prediction accuracy for a single-trait method, the single-trait  
method's predictions should be compared against the same set of  
replicates of each line (i.e., not a joint average over all replicates  
of the line as would be typical for single-trait cross-validation).  
However, because of the separation of the replicates, each replicate  
will have higher residual variance, which reduces the accuracy of  
this method. Clones are less common outside of plant breeding,  
so more distant relatives need to be used instead. In this case,  
the estimated prediction accuracies of CV2-style methods will be  
downwardly biased. In our simulations, despite relatively close  
relatives for each validation line being available, this approach was  
not successful.

In our simulations, the semi-parametric approach was the most  
reliable, and the fully parametric approach the least reliable. How-  
ever the fully parametric approach is always possible to implement  
while our semi-parametric and non-parametric approaches may  
not be possible depending on the prediction model used and the  
structure of the experimental design.

## 604 CONCLUSIONS

We expect that multi-trait methods for genomic prediction carry  
great promise to accelerate both plant and animal breeding. How-  
ever there is a need to design better methods to evaluate and train  
the prediction methods to ensure that models can be accurately  
compared. We have presented and compared three contrasting  
methods to evaluating multi-trait methods. Each of these methods  
is preferred to naive cross-validation when secondary traits of the  
target individuals are used to predict their focal traits. However  
the methods can give contrasting answers for different datasets, so  
careful consideration of which evaluation method to use is critical  
when choosing among prediction methods.

## 616 ACKNOWLEDGMENTS

We would like to thank Erin Calfee and Graham Coop for sug-  
gesting the CV2\* method, Gustavo de los Campos for pointing us  
towards the parametric approach, and helpful comments from two  
anonymous reviewers.

HC's work is support by US Department of Agriculture, Agri-  
culture and Food Research Initiative National Institute of Food

623 and Agriculture Competitive Grant No. 2018-67015-27957 DER  
624 was supported by the United States Department of Agriculture  
625 (USDA) National Institute of Food and Agriculture (NIFA), Hatch  
626 project 1010469.

## 627 SUPPLEMENTAL FIGURES

628 **Supplemental Figure 1 Actual prediction accuracy of single-trait  
629 and multi-trait prediction methods in simulated data when G  
630 and R are known.** 500 simulations were run for each heritability  
631 of the secondary trait ( $h_2^2 = \{0.2, 0.6\}$ ), and each combina-  
632 tion of genetic and non-genetic correlation between the two traits  
633 ( $\rho_g = \{0, 0.3, 0.6\}$ ,  $\rho_R = \{-0.6, -0.4, -0.2, 0, 0.2, 0.4, 0.6\}$ ), all with  
634  $h_1^2 = 0.2$ . For each simulation, we used the 900 training individuals  
635 to fit linear mixed models (either single or multi-trait) condition-  
636 ing on the true values for **G** and **R**, predicted the genetic values  
637 of the 100 testing individuals, and then measured the Pearson's  
638 correlation between the predicted ( $\hat{\mathbf{u}}_{n1}$ ) and true ( $\mathbf{u}_{n1}$ ) genetic val-  
639 ues. In the CV1 method, we used only information on the testing  
640 individuals to calculate  $\hat{\mathbf{u}}_{n1}$ . In the CV2 method, we used the  
641 training individuals to calculate  $\hat{\mathbf{u}}_o$  and combined this with the  
642 observed phenotypes for the secondary trait on the testing individ-  
643 uals ( $\mathbf{y}_{n2}$ ). Curves show the average correlation for each method  
644 across the 500 simulations. Ribbons show  $\pm 1.96 \times SE$  over the  
645 500 simulations. Dashed lines show analytical calculations of the  
646 expected correlation given one representative training:validation  
647 data partition.

648 **Supplemental Figure 2 Estimated prediction accuracies and  
649 model selection accuracies for single-trait and multi-trait pre-  
650 diction methods after semi-parametric correction when G and  
651 R are known.** Ribbons show  $\pm 1.96 \times SE$  over the 500 simula-  
652 tions. Dashed lines show the mean actual prediction accuracy:  
653  $cor(\hat{\mathbf{u}}_{n1}, \mathbf{u}_{n1})$ .

## 654 LITERATURE CITED

655 Amer, P. R. and G. Banos, 2010 Implications of avoiding overlap  
656 between training and testing data sets when evaluating genomic  
657 predictions of genetic merit. *Journal of Dairy Science* **93**: 3320–  
658 3330.  
659 Bernardo, R., 2002 *Breeding for Quantitative Traits in Plants*. Stemma  
660 Press.

Burgueño, J., G. de Los Campos, K. Weigel, and J. Crossa, 2012 Ge-  
661 nomic Prediction of Breeding Values when Modeling Genotype  
662  $\times$  Environment Interaction using Pedigree and Dense Molecular  
663 Markers. *Crop Science* **52**: 707.  
664  
665 Calus, M. P. and R. F. Veerkamp, 2011 Accuracy of multi-trait  
666 genomic selection using different methods. *Genetics Selection  
667 Evolution* **43**: 26.  
668  
669 Cheng, H., R. Fernando, and D. Garrick, 2018 Jwas: Julia imple-  
670 mentation of whole-genome analysis software. In *Proceedings  
671 of the World Congress on Genetics Applied to Livestock Production*,  
672 volume 11.  
673  
674 Crossa, J., P. Pérez-Rodríguez, J. Cuevas, O. Montesinos-López,  
675 D. Jarquín, *et al.*, 2017 Genomic Selection in Plant Breeding:  
676 Methods, Models, and Perspectives. *Trends in plant science* **22**:  
677 961–975.  
678  
679 Daetwyler, H. D., M. P. L. Calus, R. Pong-Wong, G. de Los Cam-  
680 pos, and J. M. Hickey, 2013 Genomic Prediction in Animals and  
681 Plants: Simulation of Data, Validation, Reporting, and Bench-  
682 marking. *Genetics* **193**: 347–365.  
683  
684 Dahl, A., V. Iotchkova, A. Baud, Å. Johansson, U. Gyllensten, *et al.*,  
685 2016 A multiple-phenotype imputation method for genetic stud-  
686 ies. *Nature Genetics* **48**: 466–472.  
687  
688 de Los Campos, G., J. M. Hickey, R. Pong-Wong, H. D. Daetwyler,  
689 and M. P. L. Calus, 2013 Whole-Genome Regression and Predic-  
690 tion Methods Applied to Plant and Animal Breeding. *Genetics*  
691 **193**: 327–345.  
692  
693 Falconer, D. S. and T. F. C. Mackay, 1996 *Introduction to quantitative  
694 genetics 4th edition*. Pearson, fourth edition edition.  
695  
696 Fernandes, S. B., K. O. G. Dias, D. F. Ferreira, and P. J. Brown,  
697 2017 Efficiency of multi-trait, indirect, and trait-assisted genomic  
698 selection for improvement of biomass sorghum. *TAG Theoretical  
699 and applied genetics Theoretische und angewandte Genetik* **131**:  
700 747–755.  
701  
702 Gianola, D., 2013 Priors in whole-genome regression: the bayesian  
703 alphabet returns. *Genetics* **194**: 573–596.  
704  
705 Gianola, D. and C. C. Schon, 2016 Cross-Validation Without  
706 Doing Cross-Validation in Genome-Enabled Prediction. *G3:  
707 Genes | Genomes | Genetics* **6**: 3107–3128.  
708  
709 Hastie, T., R. Tibshirani, and J. Friedman, 2009 *The elements of statis-  
710 tical learning*. Data Mining, Inference, and Prediction, Springer-  
711 Verlag New York, New York, second edition edition.  
712  
713 Hayes, B. J., P. J. Bowman, A. J. Chamberlain, and M. E. Goddard,

- 2009 Invited review: Genomic selection in dairy cattle: Progress  
and challenges. *Journal of Dairy Science* **92**: 433–443.
- Heslot, N., H.-P. Yang, M. E. Sorrells, and J.-L. Jannink, 2012 Ge-  
nomic Selection in Plant Breeding: A Comparison of Models. *Crop Science* **52**: 146–160.
- Hothorn, T., F. Leisch, A. Zeileis, and K. Hornik, 2005 The design  
and analysis of benchmark experiments. *Journal of Computa-  
tional and Graphical Statistics* **14**: 675–699.
- Jia, Y. and J.-L. Jannink, 2012 Multiple-Trait Genomic Selection  
Methods Increase Genetic Value Prediction Accuracy. *Genetics*  
**192**: 1513–1522.
- Kaufman, S., S. Rosset, C. Perlich, and O. Stitelman, 2012 Leakage  
in data mining: Formulation, detection, and avoidance. *ACM  
Transactions on Knowledge Discovery from Data (TKDD)* **6**:  
15–21.
- Lado, B., D. Vázquez, M. Quincke, P. Silva, I. Aguilar, *et al.*, 2018  
Resource allocation optimization with multi-trait genomic pre-  
diction for bread wheat (<Emphasis Type="Italic">Triticum aes-  
tivum</Emphasis> L.) baking quality. *TAG Theoretical and  
applied genetics Theoretische und angewandte Genetik* **131**:  
2719–2731.
- Legarra, A. and A. Reverter, 2018 Semi-parametric estimates of  
population accuracy and bias of predictions of breeding values  
and future phenotypes using the LR method. *Genetics Selection  
Evolution* **50**: 659.
- Lopez-Cruz, M., J. Crossa, D. Bonnett, S. Dreisigacker, J. Poland,  
*et al.*, 2015 Increased Prediction Accuracy in Wheat Breeding  
Trials Using a Marker × Environment Interaction Genomic Se-  
lection Model. *G3: Genes | Genomes | Genetics* **5**: 569–582.
- Lopez-Cruz, M., E. Olson, G. Rovere, J. Crossa, S. Dreisigacker,  
*et al.*, 2019 Genetic image-processing using regularized selection  
indices. *bioRxiv* .
- Meuwissen, T. H., B. J. Hayes, and M. E. Goddard, 2001 Prediction  
of total genetic value using genome-wide dense marker maps.  
*Genetics* **157**: 1819–1829.
- Montesinos-López, O. A., A. Montesinos-López, J. Crossa, D. Gi-  
anola, C. M. Hernández-Suárez, *et al.*, 2018 Multi-trait, Multi-  
environment Deep Learning Modeling for Genomic-Enabled  
Prediction of Plant Traits. *G3: Genes | Genomes | Genetics* **8**:  
g3.200728.2018–3840.
- Pszczola, M., R. F. Veerkamp, Y. de Haas, E. Wall, T. Strabel, *et al.*,  
2013 Effect of predictor traits on accuracy of genomic breeding  
values for feed intake based on a limited cow reference popula-  
tion. *animal* **7**: 1759–1768.
- Rutkoski, J., J. Poland, S. Mondal, E. Autrique, L. G. Pérez, *et al.*,  
2016 Canopy temperature and vegetation indices from high-  
throughput phenotyping improve accuracy of pedigree and  
genomic selection for grain yield in wheat. *G3: Genes, Genomes,  
Genetics* **6**: 2799–2808.
- Spiliopoulou, A., R. Nagy, M. L. Bermingham, J. E. Huffman,  
C. Hayward, *et al.*, 2015 Genomic prediction of complex human  
traits: relatedness, trait architecture and predictive meta-models.  
*Human molecular genetics* **24**: 4167–4182.
- Thompson, R. and K. Meyer, 1986 A review of theoretical aspects  
in the estimation of breeding values for multi-trait selection.  
*Livestock Production Science* **15**: 299–313.
- Utz, H. F., A. E. MELCHINGER, and C. C. Schön, 2000 Bias and  
Sampling Error of the Estimated Proportion of Genotypic Vari-  
ance Explained by Quantitative Trait Loci Determined From  
Experimental Data in Maize Using Cross Validation and Valid-  
ation With Independent Samples. *Genetics* **154**: 1839–1849.
- Ziyatdinov, A., M. Vazquez-Santiago, H. Brunel, A. Martinez-Perez,  
H. Aschard, *et al.*, 2018 lme4qtl: linear mixed models with flexi-  
ble covariance structure for genetic studies of related individuals.  
*BMC Bioinformatics* p. btw080.

## 768 APPENDIX

769 Here, we derive the genomic predictions  $\hat{\mathbf{u}}_{n1}$  given  $\mathbf{y}$  for the three prediction models that we use in the main text, and then evaluate the  
770 expected covariances between these predictions and the predictands  $\mathbf{u}_{n1}$  and  $\mathbf{y}_{n1}$ . We derive these relations for the more general situation  
771 with  $p \geq 1$  “secondary” traits and a single “focal” trait.

We start with a phenotypic data matrix  $\mathbf{Y}$  with  $n$  individuals and  $p + 1$  traits, where the first trait (first column of  $\mathbf{Y}$ ) is the “focal” trait, and the other  $p$  traits are “secondary” traits. We first divide  $\mathbf{Y}$  into a training partition (“old” individuals) and a testing partition (“new”

individuals), and arrange them with the testing partition first, so we can partition  $\mathbf{Y} = \begin{bmatrix} \mathbf{Y}_n \\ \mathbf{Y}_o \end{bmatrix} = \begin{bmatrix} \mathbf{y}_{n1} & \mathbf{Y}_{n2} \\ \mathbf{y}_{o1} & \mathbf{Y}_{o2} \end{bmatrix}$ . We then work with stacked versions of these phenotype matrices:  $\mathbf{y} = \text{vec}(\mathbf{Y})$ ,  $\mathbf{y}_n = \text{vec}(\mathbf{Y}_n)$ ,  $\mathbf{y}_o = \text{vec}(\mathbf{Y}_o)$ . Our genetic model for  $\mathbf{y}$  is:

$$\begin{aligned} \mathbf{y} &= \mathbf{X}\boldsymbol{\beta} + \mathbf{u} + \mathbf{e} \\ \boldsymbol{\beta} &= [\boldsymbol{\beta}_1, \boldsymbol{\beta}_2]^\top \\ \mathbf{u} &\sim \text{N}(\mathbf{0}, \mathbf{G} \otimes \mathbf{K}) \\ \mathbf{e} &\sim \text{N}(\mathbf{0}, \mathbf{R} \otimes \mathbf{I}_n) \end{aligned}$$

where  $\mathbf{G}$  and  $\mathbf{R}$  are genetic and phenotypic covariance matrices for the  $p + 1$  traits, and  $\mathbf{K}$  is the  $n \times n$  genomic relationship matrix among the lines. For convenience below, we partition the following matrices as follows: We partition the trait vectors for the training individuals and covariance matrices between the “focal” (index 1) and “secondary traits” (index 2):

$$\begin{aligned} \mathbf{y}_o &= \begin{bmatrix} \mathbf{y}_{o1} \\ \mathbf{y}_{o2} \end{bmatrix}, \mathbf{u}_o = \begin{bmatrix} \mathbf{u}_{o1} \\ \mathbf{u}_{o2} \end{bmatrix}, \mathbf{e}_o = \begin{bmatrix} \mathbf{e}_{o1} \\ \mathbf{e}_{o2} \end{bmatrix}, \mathbf{X}_o\boldsymbol{\beta} = \begin{bmatrix} \mathbf{X}_{o1}\boldsymbol{\beta}_1 \\ \mathbf{X}_{o2}\boldsymbol{\beta}_2 \end{bmatrix} \\ \mathbf{G} &= \begin{bmatrix} \mathbf{g}_{11} & \mathbf{g}_{12} \\ \mathbf{g}_{21} & \mathbf{G}_{22} \end{bmatrix} = \begin{bmatrix} \mathbf{g}_{1\cdot} \\ \mathbf{G}_{2\cdot} \end{bmatrix} = \begin{bmatrix} \mathbf{g}_{\cdot 1} & \mathbf{G}_{\cdot 2} \end{bmatrix} \\ \mathbf{R} &= \begin{bmatrix} r_{11} & \mathbf{r}_{12} \\ \mathbf{r}_{21} & \mathbf{R}_{22} \end{bmatrix} = \begin{bmatrix} \mathbf{r}_{1\cdot} \\ \mathbf{R}_{2\cdot} \end{bmatrix} = \begin{bmatrix} \mathbf{r}_{\cdot 1} & \mathbf{R}_{\cdot 2} \end{bmatrix}, \end{aligned}$$

where scalars are normal text, vectors are bold-face lower case letters, and matrices are bold-face capital letters. Partitions for the testing individuals are similar. We also partition the genomic relationship matrix and its inverse between the training and testing individuals:

$$\mathbf{K} = \begin{bmatrix} \mathbf{K}_{nn} & \mathbf{K}_{no} \\ \mathbf{K}_{on} & \mathbf{K}_{oo} \end{bmatrix}, \mathbf{K}^{-1} = \begin{bmatrix} (\mathbf{K}^{-1})_{nn} & (\mathbf{K}^{-1})_{no} \\ (\mathbf{K}^{-1})_{on} & (\mathbf{K}^{-1})_{oo} \end{bmatrix}$$

### 772 Derivation of genomic predictions

**Single trait predictions** For the single-trait prediction, we begin by estimating  $\hat{g}_{11}$ ,  $\hat{r}_{11}$  and  $\hat{\boldsymbol{\beta}}_1$  by REML using only  $\mathbf{y}_{o1}$ . The joint distribution of  $\mathbf{u}_{n1}$  and  $\mathbf{y}_{o1}$  is:

$$\begin{bmatrix} \mathbf{u}_{n1} \\ \mathbf{y}_{o1} \end{bmatrix} \sim \text{N} \left( \begin{bmatrix} \mathbf{0} \\ \mathbf{X}_{o1}\boldsymbol{\beta}_1 \end{bmatrix}, \begin{bmatrix} g_{11}\mathbf{K}_{nn} & g_{11}\mathbf{K}_{no} \\ g_{11}\mathbf{K}_{on} & g_{11}\mathbf{K}_{oo} + r_{11}\mathbf{I} \end{bmatrix} \right).$$

Let:  $\mathbf{V}_{o1} = g_{11}\mathbf{K}_{oo} + r_{11}\mathbf{I}$ . Therefore  $E[\mathbf{u}_{n1}|\mathbf{y}_{o1}] = g_{11}\mathbf{K}_{no}\mathbf{V}_{o1}^{-1}(\mathbf{y}_{o1} - \mathbf{X}_{o1}\boldsymbol{\beta}_1)$ , so our prediction is:

$$\hat{\mathbf{u}}_{n1}^{(1)} = \hat{g}_{11}\mathbf{K}_{no}\hat{\mathbf{V}}_{o1}^{-1}(\mathbf{y}_{o1} - \mathbf{X}_{o1}\hat{\boldsymbol{\beta}}_1). \quad (9)$$

To simplify, note that the joint distribution of  $\mathbf{u}_{o1}$  and  $\mathbf{y}_{o1}$  in the training data is:

$$\begin{bmatrix} \mathbf{u}_{o1} \\ \mathbf{y}_{o1} \end{bmatrix} \sim N \left( \begin{bmatrix} \mathbf{0} \\ \mathbf{X}_{o1}\boldsymbol{\beta}_1 \end{bmatrix}, \begin{bmatrix} g_{11}\mathbf{K}_{oo} & g_{11}\mathbf{K}_{oo} \\ g_{11}\mathbf{K}_{oo} & g_{11}\mathbf{K}_{oo} + r_{11}\mathbf{I} \end{bmatrix} \right)$$

773 Therefore,  $\hat{\mathbf{u}}_{n1}|\mathbf{y}_{o1} = \hat{g}_{11}\mathbf{K}_{no}\hat{\mathbf{V}}_{o1}^{-1}(\mathbf{y}_{o1} - \mathbf{X}_{o1}\hat{\boldsymbol{\beta}}_1)$ . Rearranging and plugging this in above simplifies to:  $\hat{\mathbf{u}}_{n1}^{(1)} = \mathbf{K}_{no}\mathbf{K}_{oo}^{-1}\hat{\mathbf{u}}_{o1}$ .

**CV1-style multi-trait predictions** For CV1-style multi-trait prediction, we begin by estimating  $\hat{\mathbf{G}}$ ,  $\hat{\mathbf{R}}$  and  $\hat{\boldsymbol{\beta}}$  by REML using  $\mathbf{y}_o$ . The joint distribution of  $\mathbf{u}_{n1}$  and  $\mathbf{y}_o$  is:

$$\begin{bmatrix} \mathbf{u}_{n1} \\ \mathbf{y}_o \end{bmatrix} \sim N \left( \begin{bmatrix} \mathbf{0} \\ \mathbf{X}_o\boldsymbol{\beta} \end{bmatrix}, \begin{bmatrix} g_{11}\mathbf{K}_{nn} & \mathbf{g}_{1\cdot} \otimes \mathbf{K}_{no} \\ \mathbf{g}_{1\cdot} \otimes \mathbf{K}_{on} & \mathbf{G} \otimes \mathbf{K}_{oo} + \mathbf{R} \otimes \mathbf{I} \end{bmatrix} \right)$$

Let  $\mathbf{V}_o = \mathbf{G} \otimes \mathbf{K}_{oo} + \mathbf{R} \otimes \mathbf{I}$ . Therefore,  $E[\mathbf{u}_{n1}|\mathbf{y}_o] = (\mathbf{g}_{1\cdot} \otimes \mathbf{K}_{no})\mathbf{V}_o^{-1}(\mathbf{y}_o - \mathbf{X}_o\boldsymbol{\beta})$ , so our prediction is:

$$\hat{\mathbf{u}}_{n1}^{(2)} = (\hat{\mathbf{g}}_{1\cdot} \otimes \mathbf{K}_{no})\mathbf{V}_o^{-1}(\mathbf{y}_o - \mathbf{X}_o\hat{\boldsymbol{\beta}}). \quad (10)$$

As above, to simplify this expression, we form the joint distribution of  $\mathbf{u}_o$  and  $\mathbf{y}_o$  in the training data as:

$$\begin{bmatrix} \mathbf{u}_o \\ \mathbf{y}_o \end{bmatrix} \sim N \left( \begin{bmatrix} \mathbf{0} \\ \mathbf{X}_o\boldsymbol{\beta} \end{bmatrix}, \begin{bmatrix} \mathbf{G} \otimes \mathbf{K}_{oo} & \mathbf{G} \otimes \mathbf{K}_{oo} \\ \mathbf{G} \otimes \mathbf{K}_{oo} & \mathbf{G} \otimes \mathbf{K}_{oo} + \mathbf{R} \otimes \mathbf{I} \end{bmatrix} \right)$$

774 Therefore,  $\hat{\mathbf{u}}_{o1}|\mathbf{y}_o = (\hat{\mathbf{G}} \otimes \mathbf{K}_{oo})\hat{\mathbf{V}}_o^{-1}(\mathbf{y}_o - \mathbf{X}_o\hat{\boldsymbol{\beta}})$ . Rearranging and plugging this in above simplifies to:  $\hat{\mathbf{u}}_{n1}^{(2)} = \mathbf{K}_{no}\mathbf{K}_{oo}^{-1}\hat{\mathbf{u}}_{o1}$ .

**CV2-style multi-trait predictions** For our CV2-style multi-trait prediction, we take a two-step approach. We first estimate  $\hat{\mathbf{u}}_o$  from the training individuals and then supplement this with  $\mathbf{y}_{n2}$  from the testing individuals. The joint distribution of  $\mathbf{u}_{n1}$ ,  $\mathbf{y}_{n2}$  and  $\mathbf{u}_o$  is:

$$\begin{bmatrix} \mathbf{u}_{n1} \\ \mathbf{y}_{n2} \\ \mathbf{u}_o \end{bmatrix} \sim N \left( \begin{bmatrix} \mathbf{0} \\ \mathbf{X}_2\boldsymbol{\beta}_2 \\ \mathbf{0} \end{bmatrix}, \begin{bmatrix} \mathbf{G} \otimes \mathbf{K}_{nn} + \begin{bmatrix} \mathbf{0} & \mathbf{0} \\ \mathbf{0} & \mathbf{R}_{22} \end{bmatrix} \otimes \mathbf{I}_{nn} & \mathbf{G} \otimes \mathbf{K}_{no} \\ \mathbf{G} \otimes \mathbf{K}_{on} & \mathbf{G} \otimes \mathbf{K}_{oo} \end{bmatrix} \right)$$

Conditional on a known value of  $\mathbf{u}_o$  from the training individuals, the distribution of  $\begin{bmatrix} \mathbf{u}_{n1} \\ \mathbf{y}_{n2} \end{bmatrix}$  would be:

$$\begin{bmatrix} \mathbf{u}_{n1} \\ \mathbf{y}_{n2} \end{bmatrix} | \mathbf{u}_o \sim N \left( \begin{bmatrix} \mathbf{K}_{no}\mathbf{K}_{oo}^{-1}\mathbf{u}_{o1} \\ \mathbf{X}_2\boldsymbol{\beta}_2 + \mathbf{K}_{no}\mathbf{K}_{oo}^{-1}\mathbf{u}_{o2} \end{bmatrix}, (\mathbf{G} \otimes \mathbf{K}_{nn}) + \begin{bmatrix} \mathbf{0} & \mathbf{0} \\ \mathbf{0} & \mathbf{R}_{22} \end{bmatrix} \otimes \mathbf{I}_{nn} - \left[ (\mathbf{G} \otimes \mathbf{K}_{no})(\mathbf{G}^{-1} \otimes \mathbf{K}_{oo}^{-1})(\mathbf{G} \otimes \mathbf{K}_{on}) \right] \right),$$



which simplifies to:

$$\begin{bmatrix} \mathbf{u}_{n1} \\ \mathbf{y}_{n2} \end{bmatrix} | \mathbf{u}_o \sim \mathbf{N} \left( \begin{bmatrix} \mathbf{K}_{no} \mathbf{K}_{oo}^{-1} \mathbf{u}_{o1} \\ \mathbf{X}_2 \boldsymbol{\beta}_2 + \mathbf{K}_{no} \mathbf{K}_{oo}^{-1} \mathbf{u}_{o2} \end{bmatrix}, \begin{bmatrix} g_{11} (\mathbf{K}^{-1})_{nn}^{-1} & \mathbf{g}_{12} \otimes (\mathbf{K}^{-1})_{nn}^{-1} \\ \mathbf{g}_{21} \otimes (\mathbf{K}^{-1})_{nn}^{-1} & \mathbf{G}_{22} \otimes (\mathbf{K}^{-1})_{nn}^{-1} + \mathbf{R}_{22} \otimes \mathbf{I}_{nn} \end{bmatrix} \right).$$

Let  $\mathbf{V}_c = \mathbf{G}_{22} \otimes (\mathbf{K}^{-1})_{nn}^{-1} + \mathbf{R}_{22} \otimes \mathbf{I}_{nn}$ . Now, conditioning on observed values of both  $\mathbf{u}_o$  from the training data and  $\mathbf{y}_{n2}$  from the testing data, the expectation of  $\mathbf{u}_{n1}$  would be:

$$\mathbf{E}[\mathbf{u}_{n1} | \mathbf{y}_{n2}, \mathbf{u}_o] = \mathbf{K}_{no} \mathbf{K}_{oo}^{-1} \mathbf{u}_{o1} + (\mathbf{g}_{12} \otimes (\mathbf{K}^{-1})_{nn}^{-1}) \mathbf{V}_c^{-1} (\mathbf{y}_{n2} - \mathbf{X}_2 \boldsymbol{\beta}_2 - \mathbf{K}_{no} \mathbf{K}_{oo}^{-1} \mathbf{u}_{o2}).$$

Using this, we form our prediction as:

$$\hat{\mathbf{u}}_{n1}^{(3)} = \mathbf{K}_{no} \mathbf{K}_{oo}^{-1} \hat{\mathbf{u}}_{o1} + (\hat{\mathbf{g}}_{12} \otimes (\mathbf{K}^{-1})_{nn}^{-1}) \hat{\mathbf{V}}_c^{-1} (\mathbf{y}_{n2} - \mathbf{X}_2 \hat{\boldsymbol{\beta}}_2 - \mathbf{K}_{no} \mathbf{K}_{oo}^{-1} \hat{\mathbf{u}}_{o2}), \quad (11)$$

775 where  $\hat{\mathbf{u}}_{o1}$  and  $\hat{\mathbf{u}}_{o2}$  are extracted from the calculation of  $\hat{\mathbf{u}}_o$  for the CV1-style prediction. Plugging in the solutions for these values expands  
776 to:

$$\begin{aligned} \hat{\mathbf{u}}_{n1}^{(3)} &= (\hat{\mathbf{g}}_{11} \otimes \mathbf{K}_{no}) \hat{\mathbf{V}}_o^{-1} (\mathbf{y}_o - \mathbf{X}_o \hat{\boldsymbol{\beta}}) \\ &+ (\hat{\mathbf{g}}_{12} \otimes (\mathbf{K}^{-1})_{nn}^{-1}) \hat{\mathbf{V}}_c^{-1} (\mathbf{y}_{n2} - \mathbf{X}_2 \hat{\boldsymbol{\beta}}_2 - (\hat{\mathbf{G}}_2 \otimes \mathbf{K}_{no}) \hat{\mathbf{V}}_o^{-1} (\mathbf{y}_o - \mathbf{X}_o \hat{\boldsymbol{\beta}})). \end{aligned}$$

### 777 Expectations of prediction accuracy

Now, we evaluate the expected correlation between a random sample of pairs of elements from our three candidate predictions and the predictand  $\mathbf{y}_{n1}$ . We compare these expected correlations with the expected “true” correlations with  $\mathbf{u}_{n1}$ . Below, let  $\text{var}(\mathbf{x})$  denote the variance of a random sample from a random vector  $\mathbf{x}$ ;  $\text{cov}(\mathbf{x}, \mathbf{y})$  and  $\text{cor}(\mathbf{x}, \mathbf{y})$  denote the covariance and correlation between a random sample of pairs of elements from  $\mathbf{x}$  and  $\mathbf{y}$ ; and  $\text{Cov}(\mathbf{x}, \mathbf{y})$  denote the covariance matrix between vectors  $\mathbf{x}$  and  $\mathbf{y}$ . We use the following results:

$$\text{cor}(\mathbf{x}, \mathbf{y}) = \frac{\text{cov}(\mathbf{x}, \mathbf{y})}{\sqrt{\text{var}(\mathbf{x})\text{var}(\mathbf{y})}} = \frac{1}{n-1} \frac{(\mathbf{x} - \boldsymbol{\mu}_x)^\top (\mathbf{y} - \boldsymbol{\mu}_y)}{\sqrt{\text{var}(\mathbf{x})\text{var}(\mathbf{y})}} = \frac{1}{n-1} \frac{\mathbf{x}^\top \mathbf{S} \mathbf{y}}{\sqrt{\text{var}(\mathbf{x})\text{var}(\mathbf{y})}}$$

where  $\mathbf{S} = \mathbf{I} - \frac{\mathbf{1}\mathbf{1}^\top}{n}$ .

$$\mathbf{E}[\mathbf{x}^\top \mathbf{S} \mathbf{y}] = \text{tr}(\mathbf{S} \text{Cov}(\mathbf{x}, \mathbf{y})) + \boldsymbol{\mu}_x^\top \mathbf{S} \boldsymbol{\mu}_y = \text{tr}(\mathbf{S} \text{Cov}(\mathbf{x}, \mathbf{y}))$$

where  $\text{tr}(\cdot)$  is the matrix trace, and  $\boldsymbol{\mu}_x = \mathbf{0}$  and/or  $\boldsymbol{\mu}_y = \mathbf{0}$ . Therefore, the expected correlation between  $\mathbf{x}$  and  $\mathbf{y}$  is approximately:

$$\mathbf{E}[\text{cor}(\mathbf{x}, \mathbf{y})] \approx \frac{1}{n-1} \frac{\text{tr}(\mathbf{S} \text{Cov}(\mathbf{x}, \mathbf{y}))}{\sqrt{\mathbf{E}[\text{var}(\mathbf{x})]\mathbf{E}[\text{var}(\mathbf{y})]}}.$$

778 Our goal with cross-validation is to estimate  $\text{cor}(\hat{\mathbf{u}}_{n1}, \mathbf{u}_{n1})$ . Since we do not know  $\mathbf{u}_{n1}$ , we approximate the correlation with  
779  $\text{cor}(\hat{\mathbf{u}}_{n1}, \mathbf{y}_{n1}) / \sqrt{h_1^2}$ . The factor of  $\sqrt{h_1^2}$  corrects the correlation for the larger variance of  $\mathbf{y}_{n1}$  relative to  $\mathbf{u}_{n1}$ . Otherwise, any differ-  
780 ence between these two correlations must be due to their numerators:  $\text{tr}(\mathbf{S} \text{Cov}(\hat{\mathbf{u}}_{n1}, \mathbf{u}_{n1}))$  and  $\text{tr}(\mathbf{S} \text{Cov}(\hat{\mathbf{u}}_{n1}, \mathbf{y}_{n1}))$ . Thus, for each of the  
781 three prediction methods we compare these two numerators to evaluate the accuracy and bias in the approximation.

**Single trait predictions** The numerator of the expected correlation between  $\mathbf{u}_{n1}^{(1)}$  and the true genetic values  $\mathbf{u}_{n1}$  is:

$$\begin{aligned} \text{tr}(\mathbf{S} \text{Cov}(\hat{\mathbf{u}}_{n1}^{(1)}, \mathbf{u}_{n1})) &= \text{tr} \left( \mathbf{S} \text{Cov}(\hat{g}_{11} \mathbf{K}_{no} \hat{\mathbf{V}}_{o1}^{-1} (\mathbf{y}_{o1} - \mathbf{X}_{o1} \hat{\boldsymbol{\beta}}_1), \mathbf{u}_{n1}) \right) \\ &= \text{tr} \left( \hat{g}_{11} \mathbf{S} \mathbf{K}_{no} \hat{\mathbf{V}}_{o1}^{-1} \text{Cov}(\mathbf{u}_{o1} + \mathbf{e}_{o1}, \mathbf{u}_{n1}) \right) \\ &= \text{tr} \left( \hat{g}_{11} \mathbf{S} \mathbf{K}_{no} \hat{\mathbf{V}}_{o1}^{-1} (g_{11} \mathbf{K}_{on}) \right) \\ &= \hat{g}_{11} g_{11} \text{tr} \left( \mathbf{S} \mathbf{K}_{no} \hat{\mathbf{V}}_{o1}^{-1} \mathbf{K}_{on} \right). \end{aligned}$$

where we assume that  $\hat{\beta}_1 = \beta_1$  and  $Cov(\mathbf{e}_{o1}, \mathbf{u}_{n1}) = \mathbf{0}$ . The same result for the numerator of the expected correlation between  $\mathbf{u}_{n1}^{(1)}$  and the observed phenotypic values  $\mathbf{y}_{n1}$  is:

$$\begin{aligned} tr(\mathbf{S}Cov(\hat{\mathbf{u}}_{n1}^{(1)}, \mathbf{y}_{n1})) &= tr\left(\mathbf{S}Cov(\hat{g}_{11}\mathbf{K}_{no}\hat{\mathbf{V}}_{o1}^{-1}(\mathbf{y}_{o1} - \mathbf{X}_{o1}\hat{\beta}_1), \mathbf{y}_{n1})\right) \\ &= tr\left(\hat{g}_{11}\mathbf{S}\mathbf{K}_{no}\hat{\mathbf{V}}_{o1}^{-1}Cov(\mathbf{u}_{o1} + \mathbf{e}_{o1}, \mathbf{u}_{n1} + \mathbf{e}_{n1})\right) \\ &= tr\left(\hat{g}_{11}\mathbf{S}\mathbf{K}_{no}\hat{\mathbf{V}}_{o1}^{-1}(g_{11}\mathbf{K}_{on})\right) \\ &= \hat{g}_{11}g_{11}tr\left(\mathbf{S}\mathbf{K}_{no}\hat{\mathbf{V}}_{o1}^{-1}\mathbf{K}_{on}\right), \end{aligned}$$

782 where we additionally assume  $Cov(\mathbf{u}_{o1}, \mathbf{e}_{n1}) = \mathbf{0}$  and  $Cov(\mathbf{e}_{o1}, \mathbf{e}_{n1}) = \mathbf{0}$ . Therefore, the numerators are the same, and  $cor(\hat{\mathbf{u}}_{n1}^{(1)}, \mathbf{y}_{n1}) / \sqrt{\hat{h}_1^2}$  is  
783 a consistent estimator for  $cor(\hat{\mathbf{u}}_{n1}^{(1)}, \mathbf{u}_{n1})$ .

784 **CV1-style multi-trait predictions** The numerator of the expected correlation between  $\mathbf{u}_{n1}^{(2)}$  and the true genetic values  $\mathbf{u}_{n1}$  is:

$$\begin{aligned} tr(\mathbf{S}Cov(\hat{\mathbf{u}}_n^{(2)}, \mathbf{u}_{n1})) &= tr(\mathbf{S}Cov((\hat{\mathbf{g}}_1 \otimes \mathbf{K}_{no})\hat{\mathbf{V}}_o^{-1}(\mathbf{y}_o - \mathbf{X}_o\hat{\beta}), \mathbf{u}_{n1})) \\ &= tr(\mathbf{S}(\hat{\mathbf{g}}_1 \otimes \mathbf{K}_{no})\hat{\mathbf{V}}_o^{-1}Cov(\mathbf{u}_o + \mathbf{e}_o, \mathbf{u}_{n1})) \\ &= tr(\mathbf{S}(\hat{\mathbf{g}}_1 \otimes \mathbf{K}_{no})\hat{\mathbf{V}}_o^{-1}(g_{11} \otimes \mathbf{K}_{on})), \end{aligned}$$

785 again assuming  $\hat{\beta} = \beta$  and now also  $Cov(\mathbf{e}_o, \mathbf{u}_{n1}) = \mathbf{0}$ . The same result for the numerator of the expected correlation between  $\mathbf{u}_{n1}^{(2)}$  and the  
786 observed phenotypic values  $\mathbf{y}_{n1}$  is:

$$\begin{aligned} tr(\mathbf{S}Cov(\hat{\mathbf{u}}_{n1}^{(2)}, \mathbf{y}_{n1})) &= tr(\mathbf{S}Cov((\hat{\mathbf{g}}_1 \otimes \mathbf{K}_{oo})\hat{\mathbf{V}}_o^{-1}(\mathbf{y}_o - \mathbf{X}_o\hat{\beta}), \mathbf{y}_{n1})) \\ &= tr(\mathbf{S}(\hat{\mathbf{g}}_1 \otimes \mathbf{K}_{oo})\hat{\mathbf{V}}_o^{-1}Cov(\mathbf{u}_o + \mathbf{e}_o, \mathbf{u}_{n1} + \mathbf{e}_{n1})) \\ &= tr(\mathbf{S}(\hat{\mathbf{g}}_1 \otimes \mathbf{K}_{oo})\hat{\mathbf{V}}_o^{-1}(g_{21} \otimes \mathbf{K}_{on})), \end{aligned}$$

787 where we additionally assume  $Cov(\mathbf{u}_o, \mathbf{e}_{n1}) = \mathbf{0}$  and  $Cov(\mathbf{e}_o, \mathbf{e}_{n1}) = \mathbf{0}$ . Therefore, the numerators are the same, and  $cor(\hat{\mathbf{u}}_{n1}^{(2)}, \mathbf{y}_{n1}) / \sqrt{\hat{h}_1^2}$  is a  
788 consistent estimator for  $cor(\hat{\mathbf{u}}_{n1}^{(2)}, \mathbf{u}_{n1})$ .

**CV2-style multi-trait predictions** The numerator of the expected correlation between  $\mathbf{u}_{n1}^{(3)}$  and the true genetic values  $\mathbf{u}_{n1}$  is:

$$\begin{aligned}
 tr(\mathbf{S}Cov(\hat{\mathbf{u}}_{n1}^{(3)}, \mathbf{u}_{n1})) &= tr(\mathbf{S}[Cov\left((\hat{\mathbf{g}}_1 \otimes \mathbf{K}_{no})\hat{\mathbf{V}}_o^{-1}(\mathbf{y}_o - \mathbf{X}_o\hat{\boldsymbol{\beta}}) \right. \\
 &\quad - (\hat{\mathbf{g}}_{12} \otimes (\mathbf{K}^{-1})_{nn}^{-1})\hat{\mathbf{V}}_c^{-1}(\hat{\mathbf{G}}_2 \otimes \mathbf{K}_{no})\hat{\mathbf{V}}_o^{-1}(\mathbf{y}_o - \mathbf{X}_o\hat{\boldsymbol{\beta}}) \\
 &\quad \left. + (\hat{\mathbf{g}}_{12} \otimes (\mathbf{K}^{-1})_{nn}^{-1})\hat{\mathbf{V}}_c^{-1}(\mathbf{y}_{n2} - \mathbf{X}_2\hat{\boldsymbol{\beta}}_2), \mathbf{u}_{n1}\right)]) \\
 &= tr(\mathbf{S}[Cov((\hat{\mathbf{g}}_1 \otimes \mathbf{K}_{no})\hat{\mathbf{V}}_o^{-1}(\mathbf{y}_o - \mathbf{X}_o\hat{\boldsymbol{\beta}}), \mathbf{u}_{n1}) \\
 &\quad - Cov((\hat{\mathbf{g}}_{12} \otimes (\mathbf{K}^{-1})_{nn}^{-1})\hat{\mathbf{V}}_c^{-1}(\hat{\mathbf{G}}_2 \otimes \mathbf{K}_{no})\hat{\mathbf{V}}_o^{-1}(\mathbf{y}_o - \mathbf{X}_o\hat{\boldsymbol{\beta}}), \mathbf{u}_{n1}) \\
 &\quad + Cov((\hat{\mathbf{g}}_{12} \otimes (\mathbf{K}^{-1})_{nn}^{-1})\hat{\mathbf{V}}_c^{-1}(\mathbf{y}_{n2} - \mathbf{X}_2\hat{\boldsymbol{\beta}}_2), \mathbf{u}_{n1})]) \\
 &= tr(\mathbf{S}[(\hat{\mathbf{g}}_1 \otimes \mathbf{K}_{no})\hat{\mathbf{V}}_o^{-1}Cov(\mathbf{u}_o + \mathbf{e}_o, \mathbf{u}_{n1}) \\
 &\quad - (\hat{\mathbf{g}}_{12} \otimes (\mathbf{K}^{-1})_{nn}^{-1})\hat{\mathbf{V}}_c^{-1}(\hat{\mathbf{G}}_2 \otimes \mathbf{K}_{no})\hat{\mathbf{V}}_o^{-1}Cov(\mathbf{u}_o + \mathbf{e}_o, \mathbf{u}_{n1}) \\
 &\quad + (\hat{\mathbf{g}}_{12} \otimes (\mathbf{K}^{-1})_{nn}^{-1})\hat{\mathbf{V}}_c^{-1}Cov(\mathbf{u}_{n2} + \mathbf{e}_{n2}, \mathbf{u}_{n1})]) \\
 &= tr(\mathbf{S}[(\hat{\mathbf{g}}_1 \otimes \mathbf{K}_{no})\hat{\mathbf{V}}_o^{-1}(\mathbf{g}_1 \otimes \mathbf{K}_{on}) \\
 &\quad - (\hat{\mathbf{g}}_{12} \otimes (\mathbf{K}^{-1})_{nn}^{-1})\hat{\mathbf{V}}_c^{-1}(\hat{\mathbf{G}}_2 \otimes \mathbf{K}_{no})\hat{\mathbf{V}}_o^{-1}(\mathbf{g}_1 \otimes \mathbf{K}_{on}) \\
 &\quad + (\hat{\mathbf{g}}_{12} \otimes (\mathbf{K}^{-1})_{nn}^{-1})\hat{\mathbf{V}}_c^{-1}(\mathbf{g}_{21} \otimes \mathbf{K}_{nn})]) \\
 &= tr(\mathbf{S}(\hat{\mathbf{g}}_1 \otimes \mathbf{K}_{no})\hat{\mathbf{V}}_o^{-1}(\mathbf{g}_1 \otimes \mathbf{K}_{on})) \\
 &\quad - tr(\mathbf{S}(\hat{\mathbf{g}}_{12} \otimes (\mathbf{K}^{-1})_{nn}^{-1})\hat{\mathbf{V}}_c^{-1}(\hat{\mathbf{G}}_2 \otimes \mathbf{K}_{no})\hat{\mathbf{V}}_o^{-1}(\mathbf{g}_1 \otimes \mathbf{K}_{on})) \\
 &\quad + tr(\mathbf{S}(\hat{\mathbf{g}}_{12} \otimes (\mathbf{K}^{-1})_{nn}^{-1})\hat{\mathbf{V}}_c^{-1}(\mathbf{g}_{21} \otimes \mathbf{K}_{nn})),
 \end{aligned}$$

again assuming  $\hat{\boldsymbol{\beta}} = \boldsymbol{\beta}$ ,  $Cov(\mathbf{e}_o, \mathbf{u}_{n1}) = \mathbf{0}$ , and  $Cov(\mathbf{e}_{n2}, \mathbf{u}_{n1}) = \mathbf{0}$ . From this, we can see the potential benefit of the CV2-style method:

$$\begin{aligned}
 tr(\mathbf{S}Cov(\hat{\mathbf{u}}_{n1}^{(3)}, \mathbf{u}_{n1})) - tr(\mathbf{S}Cov(\hat{\mathbf{u}}_{n1}^{(2)}, \mathbf{u}_{n1})) \\
 &= tr(\mathbf{S}(\hat{\mathbf{g}}_{12} \otimes (\mathbf{K}^{-1})_{nn}^{-1})\hat{\mathbf{V}}_c^{-1}(\mathbf{g}_{21} \otimes \mathbf{K}_{nn})) - tr(\mathbf{S}(\hat{\mathbf{g}}_{12} \otimes (\mathbf{K}^{-1})_{nn}^{-1})\hat{\mathbf{V}}_c^{-1}(\hat{\mathbf{G}}_2 \otimes \mathbf{K}_{no})\hat{\mathbf{V}}_o^{-1}(\mathbf{g}_{21} \otimes \mathbf{K}_{on})) \\
 &= tr(\mathbf{S}(\hat{\mathbf{g}}_{12} \otimes (\mathbf{K}^{-1})_{nn}^{-1})\hat{\mathbf{V}}_c^{-1}(\mathbf{g}_{21} \otimes \mathbf{K}_{nn} - (\hat{\mathbf{G}}_2 \otimes \mathbf{K}_{no})\hat{\mathbf{V}}_o^{-1}(\mathbf{g}_{21} \otimes \mathbf{K}_{on}))),
 \end{aligned}$$

789 which is generally (but maybe not necessarily) positive. This means that  $cor(\hat{\mathbf{u}}_{n1}^{(3)}, \mathbf{u}_{n1})$  is generally greater than  $cor(\hat{\mathbf{u}}_{n1}^{(2)}, \mathbf{u}_{n1})$ .

The same result for the numerator of the expected correlation between  $\mathbf{u}_{n1}^{(3)}$  and the observed phenotypic values  $\mathbf{y}_{n1}$  is:

$$\begin{aligned}
 tr(\mathbf{S}Cov(\hat{\mathbf{u}}_{n1}^{(3)}, \mathbf{y}_{n1})) &= tr(\mathbf{S}[Cov((\hat{\mathbf{g}}_1 \otimes \mathbf{K}_{no})\hat{\mathbf{V}}_o^{-1}(\mathbf{y}_o - \mathbf{X}_o\hat{\boldsymbol{\beta}}), \mathbf{u}_{n1} + \mathbf{e}_{n1}) \\
 &\quad - Cov((\hat{\mathbf{g}}_{12} \otimes (\mathbf{K}^{-1})_{nn}^{-1})\hat{\mathbf{V}}_c^{-1}(\hat{\mathbf{G}}_2 \otimes \mathbf{K}_{no})\hat{\mathbf{V}}_o^{-1}(\mathbf{y}_o - \mathbf{X}_o\hat{\boldsymbol{\beta}}), \mathbf{u}_{n1} + \mathbf{e}_{n1}) \\
 &\quad + Cov((\hat{\mathbf{g}}_{12} \otimes (\mathbf{K}^{-1})_{nn}^{-1})\hat{\mathbf{V}}_c^{-1}(\mathbf{y}_{n2} - \mathbf{X}_2\hat{\boldsymbol{\beta}}_2), \mathbf{u}_{n1} + \mathbf{e}_{n1})]) \\
 &= tr(\mathbf{S}[(\hat{\mathbf{g}}_1 \otimes \mathbf{K}_{no})\hat{\mathbf{V}}_o^{-1}Cov(\mathbf{u}_o + \mathbf{e}_o, \mathbf{u}_{n1} + \mathbf{e}_{n1}) \\
 &\quad - (\hat{\mathbf{g}}_{12} \otimes (\mathbf{K}^{-1})_{nn}^{-1})\hat{\mathbf{V}}_c^{-1}(\hat{\mathbf{G}}_2 \otimes \mathbf{K}_{no})\hat{\mathbf{V}}_o^{-1}Cov(\mathbf{u}_o + \mathbf{e}_o, \mathbf{u}_{n1} + \mathbf{e}_{n1}) \\
 &\quad + (\hat{\mathbf{g}}_{12} \otimes (\mathbf{K}^{-1})_{nn}^{-1})\hat{\mathbf{V}}_c^{-1}Cov(\mathbf{u}_{n2} + \mathbf{e}_{n2}, \mathbf{u}_{n1} + \mathbf{e}_{n1})]) \\
 &= tr(\mathbf{S}[(\hat{\mathbf{g}}_1 \otimes \mathbf{K}_{no})\hat{\mathbf{V}}_o^{-1}(\mathbf{g}_1 \otimes \mathbf{K}_{on}) \\
 &\quad - (\hat{\mathbf{g}}_{12} \otimes (\mathbf{K}^{-1})_{nn}^{-1})\hat{\mathbf{V}}_c^{-1}(\hat{\mathbf{G}}_2 \otimes \mathbf{K}_{no})\hat{\mathbf{V}}_o^{-1}(\mathbf{g}_1 \otimes \mathbf{K}_{on}) \\
 &\quad + (\hat{\mathbf{g}}_{12} \otimes (\mathbf{K}^{-1})_{nn}^{-1})\hat{\mathbf{V}}_c^{-1}(\mathbf{g}_{21} \otimes \mathbf{K}_{nn})]) \\
 &\quad + (\hat{\mathbf{g}}_{12} \otimes (\mathbf{K}^{-1})_{nn}^{-1})\hat{\mathbf{V}}_c^{-1}(\mathbf{r}_{21} \otimes \mathbf{I})]) \\
 &= tr(\mathbf{S}(\hat{\mathbf{g}}_1 \otimes \mathbf{K}_{no})\hat{\mathbf{V}}_o^{-1}(\mathbf{g}_1 \otimes \mathbf{K}_{on}) \\
 &\quad - tr(\mathbf{S}(\hat{\mathbf{g}}_{12} \otimes (\mathbf{K}^{-1})_{nn}^{-1})\hat{\mathbf{V}}_c^{-1}(\hat{\mathbf{G}}_2 \otimes \mathbf{K}_{no})\hat{\mathbf{V}}_o^{-1}(\mathbf{g}_1 \otimes \mathbf{K}_{on})) \\
 &\quad + tr(\mathbf{S}(\hat{\mathbf{g}}_{12} \otimes (\mathbf{K}^{-1})_{nn}^{-1})\hat{\mathbf{V}}_c^{-1}(\mathbf{g}_{21} \otimes \mathbf{K}_{nn})) \\
 &\quad + tr(\mathbf{S}(\hat{\mathbf{g}}_{12} \otimes (\mathbf{K}^{-1})_{nn}^{-1})\hat{\mathbf{V}}_c^{-1}(\mathbf{r}_{21} \otimes \mathbf{I}_{nn})),
 \end{aligned}$$

From this, we see that the numerator of the correlation  $cor(\hat{\mathbf{u}}_{n1}^{(3)}, \mathbf{y}_{n1})$  is not equal to that of  $cor(\hat{\mathbf{u}}_{n1}^{(3)}, \mathbf{u}_{n1})$ :

$$tr(\mathbf{S}Cov(\hat{\mathbf{u}}_{n1}^{(3)}, \mathbf{y}_{n1})) - tr(\mathbf{S}Cov(\hat{\mathbf{u}}_{n1}^{(3)}, \mathbf{u}_{n1})) = tr(\mathbf{S}(\hat{\mathbf{g}}_{12} \otimes (\mathbf{K}^{-1})_{nn}^{-1})\hat{\mathbf{V}}_c^{-1}(\mathbf{r}_{21} \otimes \mathbf{I}_{nn})).$$

790 If  $p = 1$ , then  $\hat{\mathbf{g}}_{12}$  and  $\mathbf{r}_{12}$  are scalars and this excess covariance is approximately  $n\hat{\mathbf{g}}_{12}\mathbf{r}_{12}$ .

791 **CV2\* approach** In our new CV2\* cross-validation approach, we replace  $\mathbf{y}_{n1}$  with  $\mathbf{y}_{x1}$ —the phenotypes of a new set of individuals ( $x$ ) that are  
 792 relatives of the testing partition and were not part of the training partition. Let  $\mathbf{K}_{xx}$  be the genetic relationships among these  $n_x$  individuals,  
 793 and  $\mathbf{K}_{xo}$  be their genetic relationships with the training partition. The numerator of the expected correlation  $cor(\hat{\mathbf{u}}_{n1}^{(3)}, \mathbf{y}_{x1}) / \sqrt{h_1^2}$  is:

$$\begin{aligned}
 tr(\mathbf{S}Cov(\hat{\mathbf{u}}_{n1}^{(3)}, \mathbf{y}_{x1})) &= tr(\mathbf{S}[Cov((\hat{\mathbf{g}}_1 \otimes \mathbf{K}_{no})\hat{\mathbf{V}}_o^{-1}(\mathbf{y}_o - \mathbf{X}_o\hat{\boldsymbol{\beta}}), \mathbf{u}_{x1} + \mathbf{e}_{x1}) \\
 &\quad - Cov((\hat{\mathbf{g}}_{12} \otimes (\mathbf{K}^{-1})_{nn}^{-1})\hat{\mathbf{V}}_c^{-1}(\hat{\mathbf{G}}_2 \otimes \mathbf{K}_{no})\hat{\mathbf{V}}_o^{-1}(\mathbf{y}_o - \mathbf{X}_o\hat{\boldsymbol{\beta}}), \mathbf{u}_{x1} + \mathbf{e}_{x1}) \\
 &\quad + Cov((\hat{\mathbf{g}}_{12} \otimes (\mathbf{K}^{-1})_{nn}^{-1})\hat{\mathbf{V}}_c^{-1}(\mathbf{y}_{n2} - \mathbf{X}_2\hat{\boldsymbol{\beta}}_2), \mathbf{u}_{x1} + \mathbf{e}_{x1})]) \\
 &= tr(\mathbf{S}[(\hat{\mathbf{g}}_1 \otimes \mathbf{K}_{no})\hat{\mathbf{V}}_o^{-1}Cov(\mathbf{u}_o + \mathbf{e}_o, \mathbf{u}_{x1} + \mathbf{e}_{x1}) \\
 &\quad - (\hat{\mathbf{g}}_{12} \otimes (\mathbf{K}^{-1})_{nn}^{-1})\hat{\mathbf{V}}_c^{-1}(\hat{\mathbf{G}}_2 \otimes \mathbf{K}_{no})\hat{\mathbf{V}}_o^{-1}Cov(\mathbf{u}_o + \mathbf{e}_o, \mathbf{u}_{x1} + \mathbf{e}_{x1}) \\
 &\quad + (\hat{\mathbf{g}}_{12} \otimes (\mathbf{K}^{-1})_{nn}^{-1})\hat{\mathbf{V}}_c^{-1}Cov(\mathbf{u}_{n2} + \mathbf{e}_{n2}, \mathbf{u}_{x1} + \mathbf{e}_{x1})]) \\
 &= tr(\mathbf{S}[(\hat{\mathbf{g}}_1 \otimes \mathbf{K}_{no})\hat{\mathbf{V}}_o^{-1}(\mathbf{g}_{21} \otimes \mathbf{K}_{ox}) \\
 &\quad - (\hat{\mathbf{g}}_{12} \otimes (\mathbf{K}^{-1})_{nn}^{-1})\hat{\mathbf{V}}_c^{-1}(\hat{\mathbf{G}}_2 \otimes \mathbf{K}_{no})\hat{\mathbf{V}}_o^{-1}(\mathbf{g}_{21} \otimes \mathbf{K}_{ox}) \\
 &\quad + (\hat{\mathbf{g}}_{12} \otimes (\mathbf{K}^{-1})_{nn}^{-1})\hat{\mathbf{V}}_c^{-1}(\mathbf{g}_{21} \otimes \mathbf{K}_{xx})]) \\
 &= tr(\mathbf{S}(\hat{\mathbf{g}}_1 \otimes \mathbf{K}_{no})\hat{\mathbf{V}}_o^{-1}(\mathbf{g}_{21} \otimes \mathbf{K}_{ox}) \\
 &\quad - tr(\mathbf{S}(\hat{\mathbf{g}}_{12} \otimes (\mathbf{K}^{-1})_{nn}^{-1})\hat{\mathbf{V}}_c^{-1}(\hat{\mathbf{G}}_2 \otimes \mathbf{K}_{no})\hat{\mathbf{V}}_o^{-1}(\mathbf{g}_{21} \otimes \mathbf{K}_{ox})) \\
 &\quad + tr(\mathbf{S}(\hat{\mathbf{g}}_{12} \otimes (\mathbf{K}^{-1})_{nn}^{-1})\hat{\mathbf{V}}_c^{-1}(\mathbf{g}_{21} \otimes \mathbf{K}_{xx})).
 \end{aligned}$$

794 If these new individuals are clones of the original testing set, then  $\mathbf{K}_{xx} = \mathbf{K}_{nn}$ ,  $\mathbf{K}_{ox} = \mathbf{K}_{on}$  and  $tr(\mathbf{SCov}(\hat{\mathbf{u}}_{n1}^{(3)}, \mathbf{y}_{x1})) = tr(\mathbf{SCov}(\hat{\mathbf{u}}_{n1}^{(3)}, \mathbf{u}_{n1}))$ .

795 However, if clones are not available, then this equality will not hold.

796 Given these analytical results for the numerator of the expected correlations, we can estimate the correlation itself by calculating the  
797 expected variances of  $\hat{\mathbf{u}}_{n1}$  and  $\mathbf{u}_{n1}$  or  $\mathbf{y}_{n1}$ . We do not go through these calculations as they follow directly from the calculations given above.
